# Supplementary material for: Circulating miRNAs in Small Extracellular Vesicles Secreted by a Human Melanoma Xenograft in Mouse Brains
Source: Cancers (Basel). 2020 Jun 19;12(6):1635. doi: 10.3390/cancers12061635 (PMC7352810; doi:10.3390/cancers12061635)
Supplement: Supplementary file 1 [file cancers-12-01635-s001.zip]

Archive with 5 entries (5 files):
- Supplementary figures.pdf
- Supplementary Table S1.xlsx
- Supplementary Table S2.xlsx
- Supplementary Table S3.xlsx
- Supplementary Table S4.xlsx
