# Supplementary material for: Circulating miRNAs in Small Extracellular Vesicles Secreted by a Human Melanoma Xenograft in Mouse Brains
Source: Cancers (Basel). 2020 Jun 19;12(6):1635. doi: 10.3390/cancers12061635 (PMC7352810; doi:10.3390/cancers12061635)
Supplement: Supplementary file 1 [file cancers-12-01635-s001.zip › Supplementary Table S1.xlsx]

## Sheet: human-specific miRNAs
Table S1. Normalized read counts (counts per million, CPM) for all the miRNAs found in mice total plasma at day 0 (controls), 7, 14 and 23 after intracranial injection of M14 metastatic melanoma cells. (miRNAs are classified as human-specific, mouse-specific and conserved according to the bioinformatics pipeline described in the paper)
miRNA_name	Plasma_control_rep1	Plasma_control_rep2	Plasma_day7_rep1	Plasma_day7_rep2	Plasma_day14_rep1	Plasma_day14_rep2	Plasma_day23_rep1	Plasma_day23_rep2
hsa-miR-101-5p	41	282	169	30	11	126	157	119
hsa-miR-106a-5p	0	22	0	20	68	0	47	187
hsa-miR-122-3p	81	32	313	30	135	215	910	221
hsa-miR-1246	0	65	0	0	349	670	3814	2640
hsa-miR-1268a	nd*	nd	nd	nd	nd	nd	0	68
hsa-miR-1287-5p	0	0	0	0	113	253	942	562
hsa-miR-1297	14	43	13	10	0	63	16	17
hsa-miR-1307-3p	0	0	0	0	11	25	31	68
hsa-miR-1307-5p	0	0	0	0	90	164	377	375
hsa-miR-132-5p	68	11	26	30	0	13	0	17
hsa-miR-151a-3p	0	0	0	0	191	164	377	255
hsa-miR-155-5p	0	0	0	0	56	51	330	34
hsa-miR-15a-3p	0	11	0	0	11	0	31	17
hsa-miR-17-3p	0	76	13	51	34	38	141	68
hsa-miR-182-3p	nd	nd	nd	nd	nd	nd	0	0
hsa-miR-181d-3p	0	11	0	10	45	0	nd	nd
hsa-miR-182-3p	0	11	0	30	23	63	nd	nd
hsa-miR-182-5p	0	11	0	10	45	38	47	34
hsa-miR-1827	nd	nd	nd	nd	nd	nd	16	51
hsa-miR-193a-5p	0	0	91	0	1306	1214	1742	3577
hsa-miR-193b-3p	14	0	222	223	3219	2655	9590	8056
hsa-miR-197-3p	41	43	169	121	1733	1479	6341	5229
hsa-miR-199b-5p	41	54	0	30	0	0	16	0
hsa-miR-210-5p	0	0	0	0	68	38	16	102
hsa-miR-211-5p	0	0	0	30	462	202	3375	1363
hsa-miR-21-3p	0	0	0	0	203	13	549	204
hsa-miR-2277-3p	0	0	0	0	23	25	16	17
hsa-miR-28-3p	0	0	39	0	23	278	628	238
hsa-miR-301b	0	0	0	0	101	228	722	392
hsa-miR-3180	0	0	0	0	146	177	612	1022
hsa-miR-320e	nd	nd	nd	nd	nd	nd	0	0
hsa-miR-330-3p	0	0	0	10	248	51	267	255
hsa-miR-339-3p	0	0	0	20	56	114	204	324
hsa-miR-33b-5p	0	0	0	20	349	379	926	358
hsa-miR-345-5p	14	32	39	40	934	834	3484	2759
hsa-miR-3615	0	0	0	61	56	76	345	119
hsa-miR-362-3p	0	32	0	10	405	202	1554	1056
hsa-miR-374b-3p	0	22	78	111	68	76	78	85
hsa-miR-376a-5p	108	97	104	40	0	88	0	0
hsa-miR-424-5p	68	54	26	20	79	63	345	221
hsa-miR-4326	0	0	0	10	214	152	565	664
hsa-miR-4429	nd	nd	nd	nd	nd	nd	0	68
hsa-miR-4488	0	0	26	0	90	13	47	562
hsa-miR-4492	41	0	26	0	34	13	16	34
hsa-miR-455-3p	0	0	0	0	101	25	31	34
hsa-miR-4636	0	0	0	0	11	13	78	34
hsa-miR-485-3p	54	65	91	71	68	88	204	0
hsa-miR-500a-3p	0	11	0	0	90	76	110	0
hsa-miR-501-3p	27	11	13	0	56	63	47	119
hsa-miR-501-5p	0	11	0	40	56	38	173	102
hsa-miR-502-3p	0	0	0	40	439	417	1507	766
hsa-miR-505-3p	0	0	0	0	34	13	141	51
hsa-miR-513a-5p	0	0	0	20	0	38	47	102
hsa-miR-515-3p	0	0	0	0	23	38	31	68
hsa-miR-551a	0	0	0	0	34	25	267	102
hsa-miR-576-5p	14	0	0	0	11	38	94	85
hsa-miR-579-3p	0	0	0	0	45	13	31	68
hsa-miR-598-3p	0	0	0	10	146	139	518	409
hsa-miR-625-3p	0	0	0	0	23	63	173	102
hsa-miR-627-5p	0	0	0	10	101	76	439	51
hsa-miR-628-3p	0	0	0	30	11	0	141	17
hsa-miR-629-5p	0	11	0	10	23	76	110	102
hsa-miR-660-5p	14	54	39	30	1565	1327	5148	3696
hsa-miR-664a-3p	0	0	0	0	11	25	63	17
hsa-miR-6756-3p	0	0	0	0	11	13	31	34
hsa-miR-766-3p	0	0	0	0	45	101	141	187
hsa-miR-7706	0	0	0	0	34	25	16	51
hsa-miR-7975	nd	nd	nd	nd	nd	nd	16	0
hsa-miR-802	108	32	104	132	270	215	408	392
hsa-miR-887-3p	0	0	52	51	1036	809	2511	2521
hsa-miR-98-3p	14	11	39	81	146	101	110	221
*nd=not detected

## Sheet: mouse-specific miRNAs
miRNA_name	Plasma_control_rep1	Plasma_control_rep2	Plasma_day7_rep1	Plasma_day7_rep2	Plasma_day14_rep1	Plasma_day14_rep2	Plasma_day23_rep1	Plasma_day23_rep2
mmu-let-7k	nd	nd	nd	nd	nd	nd	16	34
mmu-miR-100-3p	0	152	0	91	56	76	0	17
mmu-miR-101b-3p	56822	38933	20310	51591	88035	29644	47024	34080
mmu-miR-103-1-5p	217	585	652	395	473	468	800	392
mmu-miR-106a-5p	244	325	352	152	315	316	314	1737
mmu-miR-107-5p	637	736	834	617	855	758	800	698
mmu-miR-1188-5p	0	0	0	40	11	25	0	17
mmu-miR-1190	461	1765	456	1043	383	1340	581	818
mmu-miR-1191	1680	2112	2803	2541	2713	2667	2621	3491
mmu-miR-1191b-5p	0	11	39	51	34	13	0	0
mmu-miR-1193-3p	122	152	117	162	101	152	63	119
mmu-miR-1198-3p	136	195	78	40	56	0	157	51
mmu-miR-1198-5p	4174	4993	4797	2814	3140	3729	4065	6608
mmu-miR-122-3p	2073	726	3911	1215	3028	1719	6514	2623
mmu-miR-1224-3p	14	22	26	20	68	51	16	17
mmu-miR-1224-5p	122	0	26	20	45	38	16	0
mmu-miR-1258-3p	nd	nd	nd	nd	nd	nd	0	34
mmu-miR-1258-5p	14	108	52	172	90	38	16	34
mmu-miR-125b-2-3p	149	76	130	81	56	126	16	51
mmu-miR-129b-3p	0	22	130	91	68	114	47	68
mmu-miR-129b-5p	0	11	13	30	0	0	16	0
mmu-miR-130a-5p	190	43	0	132	79	25	126	375
mmu-miR-132-5p	54	141	156	30	79	139	94	51
mmu-miR-135a-2-3p	136	76	65	101	11	38	31	17
mmu-miR-138-1-3p	0	0	0	51	23	25	47	51
mmu-miR-146a-3p	0	22	0	20	0	51	47	34
mmu-miR-146b-3p	54	65	26	132	169	63	16	136
mmu-miR-151-3p	6451	8859	7261	7268	5290	7319	3924	7443
mmu-miR-155-5p	3916	2220	5058	4474	4885	4462	5603	3560
mmu-miR-15a-3p	1626	3173	2177	2126	2251	4210	2323	3389
mmu-miR-16-2-3p	13443	28980	24156	28382	9602	39062	29319	43856
mmu-miR-17-3p	99970	111807	75582	74477	59950	15195	99479	64362
mmu-miR-181c-3p	2914	2816	4185	3745	3546	3691	3484	4156
mmu-miR-182-5p	637	606	1395	1043	2690	3034	1868	2078
mmu-miR-1839-3p	4323	4429	5788	5081	5324	6460	5399	7545
mmu-miR-1839-5p	33174	31428	31039	26104	25113	30276	28880	33569
mmu-miR-1843a-3p	95	43	0	61	203	88	78	273
mmu-miR-1843a-5p	366	347	456	162	619	771	628	511
mmu-miR-1843b-3p	0	0	0	10	56	0	nd	nd
mmu-miR-1843b-5p	827	1689	886	1154	822	1353	534	954
mmu-miR-186-3p	2168	3931	1212	1690	1385	1479	722	2674
mmu-miR-187-5p	14	76	104	142	45	76	78	51
mmu-miR-18b-3p	41	11	91	20	0	25	47	0
mmu-miR-18b-5p	14	108	13	51	0	25	16	34
mmu-miR-190a-3p	732	184	300	354	281	379	534	136
mmu-miR-191-3p	108	119	261	364	281	291	220	255
mmu-miR-1927	27	173	130	0	90	329	110	358
mmu-miR-1928	nd	nd	nd	nd	nd	nd	0	0
mmu-miR-1929-3p	0	11	13	10	68	114	31	17
mmu-miR-1930-5p	379	509	1408	577	1193	1100	1099	1397
mmu-miR-1934-3p	27	152	287	20	45	265	188	273
mmu-miR-1934-5p	298	43	130	142	146	152	126	102
mmu-miR-193a-5p	691	563	795	0	1294	784	424	204
mmu-miR-193b-3p	19501	9476	28092	20881	25732	21452	16496	16452
mmu-miR-1941-3p	0	11	0	20	23	25	78	0
mmu-miR-194-1-3p	0	11	52	20	0	13	31	0
mmu-miR-1943-3p	54	43	91	121	23	139	78	102
mmu-miR-1943-5p	122	11	52	61	56	25	47	0
mmu-miR-1945	0	0	0	10	23	38	nd	nd
mmu-miR-1947-5p	27	184	0	121	0	38	63	85
mmu-miR-1950	0	43	0	20	68	88	110	17
mmu-miR-1953	312	119	39	233	113	101	126	119
mmu-miR-1954	1626	2318	1773	1964	1914	2629	3155	2282
mmu-miR-1955-3p	0	22	0	30	0	13	0	51
mmu-miR-1956	41	141	130	121	68	63	94	68
mmu-miR-1957a	nd	nd	nd	nd	nd	nd	31	17
mmu-miR-1958	27	11	0	0	0	25	16	68
mmu-miR-1960	0	65	13	152	113	38	110	0
mmu-miR-1961	0	11	0	0	11	13	16	34
mmu-miR-1964-3p	257	379	404	617	304	417	251	273
mmu-miR-1964-5p	718	1419	769	678	765	657	487	800
mmu-miR-1968-5p	14	54	0	0	0	13	16	204
mmu-miR-196a-2-3p	nd	nd	nd	nd	nd	nd	78	34
mmu-miR-1970	271	282	404	385	405	493	455	494
mmu-miR-1981-3p	583	368	274	304	371	278	675	664
mmu-miR-1981-5p	190	3292	2112	2763	1711	2086	1585	2316
mmu-miR-1982-3p	95	152	78	111	248	303	188	68
mmu-miR-1983	95	152	183	152	79	367	78	204
mmu-miR-199b-5p	163256	123362	114768	131230	110232	129676	80220	69727
mmu-miR-19a-5p	54	314	104	294	45	253	110	409
mmu-miR-1a-1-5p	41	108	104	698	1069	1580	251	119
mmu-miR-1b-3p	81	97	0	10	23	25	47	153
mmu-miR-202-3p	14	87	117	132	68	76	63	85
mmu-miR-203-5p	2561	2523	3689	3290	4300	4968	3280	3389
mmu-miR-205-3p	122	11	326	202	56	190	0	0
mmu-miR-20a-3p	0	0	104	10	0	114	188	358
mmu-miR-20b-3p	583	184	469	385	0	442	251	307
mmu-miR-210-5p	1545	1061	3050	1984	2004	1517	1632	1805
mmu-miR-211-5p	1057	108	1160	1144	1216	1049	1695	766
mmu-miR-2137	nd	nd	nd	nd	nd	nd	126	443
mmu-miR-215-3p	54	206	156	425	439	379	345	136
mmu-miR-215-5p	99157	115987	204260	194644	236493	193932	159703	103142
mmu-miR-218-1-3p	41	87	0	51	23	101	63	0
mmu-miR-219a-1-3p	217	32	0	182	79	38	16	17
mmu-miR-219c-5p	0	22	0	10	0	13	nd	nd
mmu-miR-21a-3p	2399	1375	1851	2611	2150	2238	2354	2998
mmu-miR-224-5p	705	563	1134	1690	822	1479	989	426
mmu-miR-24-2-5p	16370	17945	21822	21904	18978	21983	14079	17662
mmu-miR-26a-2-3p	244	119	39	142	113	25	47	68
mmu-miR-28a-3p	0	108	65	344	23	253	188	119
mmu-miR-292b-3p	0	0	65	81	34	0	31	0
mmu-miR-293-3p	0	0	0	0	68	25	16	51
mmu-miR-294-3p	488	401	78	273	248	632	251	119
mmu-miR-295-3p	0	11	13	0	23	0	0	17
mmu-miR-297a-3p	54	11	65	20	158	88	188	255
mmu-miR-297b-5p	325	130	261	283	191	379	345	392
mmu-miR-297c-5p	488	206	287	132	203	253	235	170
mmu-miR-298-3p	352	682	287	283	135	291	47	170
mmu-miR-298-5p	339	184	196	192	56	51	31	0
mmu-miR-299a-3p	136	152	78	61	11	38	0	34
mmu-miR-300-3p	732	1765	1160	1265	709	1277	691	613
mmu-miR-301b-3p	7264	6476	6010	5172	6900	7383	7769	11530
mmu-miR-3057-3p	0	11	0	30	0	0	16	17
mmu-miR-3058-3p	122	43	91	91	113	126	31	136
mmu-miR-3058-5p	827	1235	717	506	709	885	659	613
mmu-miR-3060-3p	217	11	52	81	101	25	31	119
mmu-miR-3061-3p	95	206	130	152	146	177	110	204
mmu-miR-3061-5p	108	108	130	20	34	38	141	85
mmu-miR-3062-5p	339	693	717	698	248	544	565	477
mmu-miR-3066-3p	0	0	39	30	23	63	16	85
mmu-miR-3066-5p	14	11	52	132	79	139	78	85
mmu-miR-3068-3p	1233	877	1160	1255	1114	1150	1287	1431
mmu-miR-3072-3p	257	54	209	81	124	88	126	68
mmu-miR-3075-3p	27	76	0	20	34	51	0	17
mmu-miR-3075-5p	95	65	0	71	90	38	63	17
mmu-miR-3076-3p	54	11	26	40	79	38	31	170
mmu-miR-3077-3p	0	11	0	40	0	25	16	0
mmu-miR-3081-3p	0	11	0	10	23	13	16	0
mmu-miR-3082-3p	0	11	26	0	0	25	31	51
mmu-miR-3082-5p	136	11	52	51	23	63	173	51
mmu-miR-3084-3p	68	173	143	162	113	126	141	102
mmu-miR-3084-5p	447	628	756	870	765	784	1020	1056
mmu-miR-3085-3p	14	0	0	30	34	13	0	0
mmu-miR-3089-3p	81	0	39	20	0	25	16	17
mmu-miR-3090-3p	163	130	143	111	158	76	157	0
mmu-miR-3091-5p	379	97	78	30	90	164	0	68
mmu-miR-3094-3p	0	11	26	0	11	25	16	68
mmu-miR-3097-3p	407	498	209	283	326	708	816	732
mmu-miR-3098-3p	95	97	39	91	90	25	63	51
mmu-miR-3098-5p	122	173	91	121	56	76	235	170
mmu-miR-30b-3p	244	22	156	0	0	88	78	255
mmu-miR-3100-3p	0	11	26	20	0	51	0	0
mmu-miR-3101-5p	217	162	91	132	169	190	141	187
mmu-miR-3102-3p	4892	2686	3024	2986	2240	2554	1240	2759
mmu-miR-3102-3p.2-3p	637	238	313	334	315	240	235	136
mmu-miR-3102-5p.2-5p	149	76	52	91	101	114	0	51
mmu-miR-3103-3p	0	11	65	0	45	25	16	0
mmu-miR-3105-3p	0	0	117	20	34	25	63	17
mmu-miR-3105-5p	217	130	665	283	0	152	204	221
mmu-miR-3110-5p	27	0	0	20	34	13	0	17
mmu-miR-3112-3p	0	0	0	40	0	51	16	119
mmu-miR-3112-5p	68	173	117	142	191	126	283	375
mmu-miR-322-3p	18633	16320	11107	11600	4795	11339	5996	8124
mmu-miR-322-5p	20639	12129	8121	6539	25259	7244	28550	42510
mmu-miR-324-3p	217	1202	587	71	135	948	1632	1022
mmu-miR-329-3p	1450	1018	495	476	383	556	204	409
mmu-miR-329-5p	271	217	78	20	11	63	16	34
mmu-miR-330-3p	1450	942	2151	435	1733	1441	895	2401
mmu-miR-337-3p	488	238	365	567	293	291	204	221
mmu-miR-339-3p	244	152	183	223	225	278	126	307
mmu-miR-341-3p	244	455	352	213	180	63	0	273
mmu-miR-344-3p	27	0	52	61	79	25	78	51
mmu-miR-344d-3p	0	0	143	40	34	76	47	85
mmu-miR-345-3p	0	0	26	51	45	63	16	0
mmu-miR-345-5p	1938	1592	1590	1316	1317	1707	1664	2112
mmu-miR-346-5p	0	11	143	40	0	0	0	51
mmu-miR-3473b	691	552	1030	1215	1126	1049	895	664
mmu-miR-3473d	136	11	0	10	56	13	16	0
mmu-miR-3473g	0	0	13	10	11	25	78	34
mmu-miR-3474	0	0	130	152	79	25	47	0
mmu-miR-34b-3p	529	130	521	314	585	430	722	307
mmu-miR-34b-5p	325	1170	691	921	68	923	1256	715
mmu-miR-34c-3p	149	54	196	344	68	164	377	119
mmu-miR-350-3p	12074	5967	11054	9444	14385	21465	18678	26501
mmu-miR-350-5p	27	11	13	61	11	164	110	17
mmu-miR-351-3p	0	325	287	71	101	164	267	17
mmu-miR-351-5p	11058	4863	2203	1954	1441	1201	1209	1993
mmu-miR-3535	461	97	352	425	608	455	377	119
mmu-miR-3547-3p	0	11	0	40	23	0	16	0
mmu-miR-3572-3p	108	87	274	20	113	139	173	119
mmu-miR-362-3p	8456	4148	6831	4494	9061	10252	8805	9742
mmu-miR-362-5p	244	108	78	51	45	51	94	136
mmu-miR-363-5p	68	119	26	30	0	76	141	17
mmu-miR-376a-3p	9432	16710	7287	7946	3366	5196	2150	1822
mmu-miR-376a-5p	176	282	183	111	56	253	0	102
mmu-miR-376b-3p	1152	1310	1212	1397	844	999	800	1431
mmu-miR-376b-5p	2046	6086	1577	1619	844	1302	675	749
mmu-miR-376c-3p	3456	5805	6700	4960	4334	4918	3076	3781
mmu-miR-378c	87327	132686	106517	93101	79818	98944	78447	78838
mmu-miR-384-3p	0	0	0	30	34	0	94	51
mmu-miR-384-5p	14	0	0	0	45	0	31	119
mmu-miR-3968	nd	nd	nd	nd	nd	nd	63	119
mmu-miR-421-5p	81	32	156	101	191	228	126	221
mmu-miR-429-3p	12251	9130	9138	16205	14824	20745	9810	7477
mmu-miR-434-3p	1206	477	1369	1093	889	872	628	1073
mmu-miR-434-5p	1464	1386	1708	1609	765	1062	439	715
mmu-miR-449c-5p	772	1516	678	1093	619	1176	863	1056
mmu-miR-450b-3p	1220	238	235	253	248	354	596	698
mmu-miR-455-3p	8090	4754	1278	901	563	1100	628	852
mmu-miR-465b-5p	68	11	0	30	68	13	0	0
mmu-miR-466c-3p	1179	412	183	172	563	265	753	3883
mmu-miR-466c-5p	95	22	0	0	11	51	31	85
mmu-miR-466d-3p	691	162	443	385	653	506	769	1414
mmu-miR-466e-3p	108	0	0	10	45	88	251	545
mmu-miR-466f	542	347	548	405	101	240	220	375
mmu-miR-466f-3p	95	0	65	61	158	76	78	255
mmu-miR-466g	14	11	0	30	45	25	78	119
mmu-miR-466h-3p	1328	661	1942	1670	1756	1530	1130	2980
mmu-miR-466h-5p	312	119	0	101	68	152	251	324
mmu-miR-466i-5p	46116	62694	36070	37755	25203	35409	28801	36396
mmu-miR-466k	27	87	78	81	34	88	31	136
mmu-miR-466m-3p	149	32	65	0	135	76	173	273
mmu-miR-466n-3p	81	32	0	30	79	13	47	307
mmu-miR-466n-5p	81	22	13	30	11	63	0	85
mmu-miR-467a-5p	2981	2621	939	810	1249	1466	816	3423
mmu-miR-467c-3p	149	11	0	61	34	101	16	68
mmu-miR-467c-5p	149	152	91	101	124	190	31	341
mmu-miR-467d-3p	1667	563	991	415	1880	1087	2323	6693
mmu-miR-467e-3p	176	43	65	51	146	215	141	392
mmu-miR-467e-5p	556	975	391	324	56	683	628	3236
mmu-miR-470-3p	0	11	0	51	56	13	0	0
mmu-miR-483-5p	14	11	130	111	101	114	31	17
mmu-miR-485-3p	163	141	117	192	214	114	78	51
mmu-miR-489-3p	0	76	0	10	68	25	16	51
mmu-miR-495-5p	41	0	26	0	23	38	0	17
mmu-miR-500-3p	6884	4884	5475	6397	6405	9102	5886	3764
mmu-miR-501-3p	2073	2729	2060	3786	2127	2617	1554	2248
mmu-miR-501-5p	1206	1040	456	850	371	619	204	613
mmu-miR-503-3p	1274	726	613	820	552	670	581	596
mmu-miR-503-5p	5109	1949	143	405	1306	1011	1821	2367
mmu-miR-505-3p	312	282	352	263	293	164	126	528
mmu-miR-5103	163	65	52	182	90	152	47	170
mmu-miR-5107-3p	81	184	287	202	304	240	267	204
mmu-miR-5113	27	32	0	61	23	13	0	17
mmu-miR-511-3p	7968	8794	7704	5972	5324	6839	6043	3951
mmu-miR-5114	217	401	196	71	11	101	94	102
mmu-miR-511-5p	41	0	26	10	11	0	nd	nd
mmu-miR-5121	230	32	156	61	259	190	126	68
mmu-miR-5123	190	65	0	40	45	51	16	34
mmu-miR-5129-3p	108	0	91	182	124	13	47	68
mmu-miR-5129-5p	nd	nd	nd	nd	nd	nd	63	34
mmu-miR-5132-3p	68	119	104	101	124	190	94	34
mmu-miR-5132-5p	14	0	39	10	11	13	0	0
mmu-miR-5134-3p	54	292	91	314	203	202	173	204
mmu-miR-5134-5p	14	22	26	40	45	88	63	85
mmu-miR-540-3p	556	477	339	344	124	190	78	221
mmu-miR-541-5p	163	292	26	61	68	114	0	17
mmu-miR-542-5p	3117	1657	2360	2358	2161	1921	1946	1908
mmu-miR-543-5p	0	0	26	81	23	13	0	0
mmu-miR-547-3p	0	43	0	20	23	25	0	34
mmu-miR-5615-3p	0	97	52	30	11	63	31	119
mmu-miR-5618-3p	54	43	26	0	56	13	0	0
mmu-miR-5619-3p	68	32	26	71	11	88	16	102
mmu-miR-5619-5p	14	54	0	10	11	51	16	119
mmu-miR-5620-3p	0	0	13	40	45	0	0	34
mmu-miR-5622-3p	41	22	39	0	11	25	16	0
mmu-miR-5622-5p	163	108	0	40	56	63	16	273
mmu-miR-5627-3p	81	97	183	71	68	76	63	34
mmu-miR-582-3p	745	671	1251	1326	788	1087	691	732
mmu-miR-582-5p	2493	2123	2659	3634	2308	2933	1899	1431
mmu-miR-592-3p	0	11	65	10	11	25	16	17
mmu-miR-598-3p	14	54	183	121	326	265	220	341
mmu-miR-6360	nd	nd	nd	nd	nd	nd	16	17
mmu-miR-6383	nd	nd	nd	nd	nd	nd	0	0
mmu-miR-6395	nd	nd	nd	nd	nd	nd	0	17
mmu-miR-652-5p	122	43	130	111	23	101	110	17
mmu-miR-6538	27	0	26	40	45	13	0	51
mmu-miR-6546-3p	203	249	404	213	236	278	235	119
mmu-miR-6546-5p	217	227	26	30	56	63	31	17
mmu-miR-664-3p	1992	791	2555	1417	3118	2364	5227	4820
mmu-miR-664-5p	176	477	248	213	158	228	204	153
mmu-miR-665-3p	0	585	274	334	135	354	31	51
mmu-miR-666-3p	149	661	521	132	79	215	78	119
mmu-miR-667-3p	827	249	508	395	304	329	94	375
mmu-miR-669a-3-3p	14	11	0	0	0	51	16	0
mmu-miR-669a-5p	1193	271	78	304	135	139	94	766
mmu-miR-669b-3p	95	0	26	81	34	38	47	221
mmu-miR-669b-5p	5028	4126	5684	4241	1767	4614	3218	6915
mmu-miR-669c-5p	3442	2242	3233	1599	1385	3615	2339	2912
mmu-miR-669d-3p	nd	nd	nd	nd	nd	nd	0	119
mmu-miR-669d-5p	163	32	0	111	56	101	126	102
mmu-miR-669e-3p	14	54	0	30	0	25	31	153
mmu-miR-669e-5p	54	65	313	243	101	63	126	443
mmu-miR-669f-3p	68	11	117	91	79	38	126	136
mmu-miR-669f-5p	1152	444	378	263	113	417	345	800
mmu-miR-669l-5p	1165	260	378	172	236	228	345	1397
mmu-miR-669m-3p	176	11	209	121	214	101	141	187
mmu-miR-669m-5p	244	65	130	40	45	38	78	68
mmu-miR-669o-3p	1979	704	913	415	1024	1024	1287	3713
mmu-miR-669o-5p	14	0	65	0	11	13	78	119
mmu-miR-672-3p	68	0	0	0	56	25	63	51
mmu-miR-672-5p	244	975	169	526	169	860	267	1090
mmu-miR-674-3p	1775	856	2307	1650	2623	2086	2496	2435
mmu-miR-674-5p	6098	1321	4328	3118	1880	7117	8837	4309
mmu-miR-675-3p	529	336	235	121	23	88	0	68
mmu-miR-676-3p	7209	14869	17859	17622	7744	19076	14440	15430
mmu-miR-676-5p	2778	4505	4836	4160	4908	5638	6137	7732
mmu-miR-677-5p	0	43	183	71	23	101	0	153
mmu-miR-6902-3p	27	11	0	10	0	88	nd	nd
mmu-miR-6903-3p	0	43	0	40	11	13	0	0
mmu-miR-6904-3p	122	43	39	40	11	38	31	153
mmu-miR-6904-5p	0	11	0	0	45	38	0	51
mmu-miR-6914-3p	529	260	209	536	495	480	628	443
mmu-miR-6915-3p	122	22	104	20	45	38	188	68
mmu-miR-6917-3p	0	11	26	0	34	25	47	0
mmu-miR-6919-3p	0	54	65	51	0	51	0	17
mmu-miR-6921-3p	41	11	104	20	68	0	78	153
mmu-miR-6925-3p	0	54	52	10	23	0	0	51
mmu-miR-6928-3p	0	22	39	61	11	51	141	34
mmu-miR-6931-3p	0	0	26	0	34	76	31	0
mmu-miR-6935-3p	0	0	0	40	11	25	0	102
mmu-miR-6935-5p	0	22	0	30	0	13	0	34
mmu-miR-6936-5p	325	141	222	273	113	190	31	68
mmu-miR-6939-3p	0	32	0	10	11	38	94	68
mmu-miR-6943-3p	176	141	209	253	169	164	173	290
mmu-miR-6944-3p	41	11	13	10	0	0	16	34
mmu-miR-6945-3p	68	0	65	51	34	25	31	34
mmu-miR-6946-3p	41	0	0	10	68	13	16	0
mmu-miR-6948-3p	14	32	52	51	56	38	63	0
mmu-miR-6951-5p	0	11	65	10	0	25	0	17
mmu-miR-6952-3p	0	22	26	71	113	25	31	0
mmu-miR-6954-3p	0	32	0	10	56	0	nd	nd
mmu-miR-6955-3p	0	11	52	0	68	126	63	102
mmu-miR-6955-5p	95	108	78	20	23	13	47	51
mmu-miR-6956-3p	41	32	78	121	225	139	78	119
mmu-miR-6957-3p	0	108	26	81	101	38	47	170
mmu-miR-6957-5p	14	11	0	30	0	38	16	34
mmu-miR-6958-3p	0	22	0	10	0	25	16	34
mmu-miR-6959-3p	0	76	0	30	23	13	16	51
mmu-miR-6959-5p	0	11	39	0	0	51	16	34
mmu-miR-6960-5p	0	22	78	40	101	88	78	136
mmu-miR-6961-5p	41	0	13	30	23	0	0	0
mmu-miR-6965-3p	14	108	0	51	135	63	47	17
mmu-miR-6966-3p	68	43	0	0	0	25	0	34
mmu-miR-6967-3p	3361	1343	3063	1296	2521	2389	5038	5978
mmu-miR-6967-5p	230	628	430	536	540	721	644	1005
mmu-miR-6968-3p	14	11	0	30	23	38	16	85
mmu-miR-6970-3p	108	32	0	51	0	13	0	85
mmu-miR-6971-3p	0	11	0	20	34	38	0	51
mmu-miR-6975-3p	nd	nd	nd	nd	nd	nd	126	34
mmu-miR-6976-3p	0	11	52	51	101	76	31	0
mmu-miR-6980-3p	27	11	26	162	11	13	63	17
mmu-miR-6984-3p	68	11	0	0	0	25	16	0
mmu-miR-6986-3p	68	130	117	121	203	139	47	68
mmu-miR-6986-5p	0	11	39	0	11	13	0	0
mmu-miR-6988-3p	271	260	626	283	597	582	471	630
mmu-miR-6989-3p	54	65	0	40	23	38	16	34
mmu-miR-6990-3p	27	11	0	10	23	0	0	34
mmu-miR-6993-3p	0	22	91	20	68	63	0	17
mmu-miR-6993-5p	0	32	26	0	11	25	31	51
mmu-miR-6994-3p	68	76	26	61	11	63	47	153
mmu-miR-7003-3p	54	22	0	40	34	38	0	102
mmu-miR-7003-5p	0	54	26	81	0	38	16	17
mmu-miR-700-3p	420	227	574	415	495	430	267	153
mmu-miR-700-5p	8659	7841	10246	6640	8059	8356	7895	10219
mmu-miR-7007-3p	27	22	104	132	90	126	0	17
mmu-miR-7007-5p	0	0	65	0	11	13	16	0
mmu-miR-7008-3p	68	0	26	0	56	0	0	34
mmu-miR-7010-5p	54	43	26	0	214	76	141	119
mmu-miR-7012-3p	0	22	26	0	23	13	16	0
mmu-miR-701-3p	0	65	39	81	23	76	31	221
mmu-miR-7015-3p	122	0	391	142	90	114	78	119
mmu-miR-701-5p	0	87	26	101	90	139	94	153
mmu-miR-7016-3p	68	54	0	10	34	0	nd	nd
mmu-miR-7020-3p	0	0	0	20	23	25	31	0
mmu-miR-702-3p	1436	379	1186	941	619	493	706	545
mmu-miR-7026-5p	14	43	0	10	0	25	nd	nd
mmu-miR-7027-3p	14	54	0	10	34	0	0	17
mmu-miR-7030-3p	54	0	65	81	68	88	173	17
mmu-miR-7035-3p	0	22	0	10	0	13	nd	nd
mmu-miR-7036-5p	0	0	39	30	11	13	0	0
mmu-miR-7036b-5p	14	379	235	344	0	240	126	187
mmu-miR-7041-3p	68	32	39	10	45	63	47	68
mmu-miR-7041-5p	0	43	0	40	11	38	0	0
mmu-miR-7042-3p	0	65	65	101	90	25	63	85
mmu-miR-7043-3p	122	87	196	253	236	139	188	85
mmu-miR-7048-3p	68	43	183	142	56	13	31	119
mmu-miR-7052-3p	3036	2177	2972	2449	2566	1454	2119	3883
mmu-miR-7053-3p	68	0	39	20	0	0	0	17
mmu-miR-7054-3p	136	119	39	152	101	177	63	153
mmu-miR-7060-3p	0	11	0	0	56	25	63	34
mmu-miR-7063-3p	54	32	0	40	45	76	110	136
mmu-miR-7065-3p	54	11	13	10	23	38	16	68
mmu-miR-7065-5p	41	249	78	142	315	164	235	307
mmu-miR-7067-3p	27	130	91	101	34	63	94	119
mmu-miR-7068-5p	14	54	39	0	0	63	0	51
mmu-miR-7069-3p	0	97	26	40	11	63	31	68
mmu-miR-7072-3p	0	0	39	20	225	51	0	0
mmu-miR-7073-5p	68	65	26	30	45	13	47	85
mmu-miR-7075-3p	312	152	391	202	338	417	487	630
mmu-miR-7079-3p	68	22	39	91	113	63	47	68
mmu-miR-7083-5p	0	43	78	0	79	38	31	0
mmu-miR-7084-5p	0	97	261	142	124	25	31	102
mmu-miR-7085-3p	27	0	65	0	0	25	47	0
mmu-miR-7087-3p	41	22	0	20	0	0	0	17
mmu-miR-709	14	22	13	30	45	0	31	17
mmu-miR-7091-3p	285	412	287	344	462	455	267	579
mmu-miR-7091-5p	108	162	209	182	203	228	63	187
mmu-miR-7117-3p	366	227	209	385	248	202	455	392
mmu-miR-7118-3p	0	0	65	71	68	190	47	0
mmu-miR-7119-3p	122	97	222	213	248	88	204	238
mmu-miR-7219-3p	149	43	117	152	214	215	157	170
mmu-miR-7235-3p	0	0	52	40	0	25	16	34
mmu-miR-7646-5p	0	0	65	30	0	38	47	68
mmu-miR-7647-5p	27	119	52	71	0	13	31	85
mmu-miR-7649-3p	0	0	65	10	56	0	0	68
mmu-miR-7652-3p	0	22	26	10	0	0	nd	nd
mmu-miR-7653-3p	68	43	117	81	23	114	47	85
mmu-miR-7653-5p	14	32	65	0	124	152	141	102
mmu-miR-7654-5p	122	54	0	0	45	25	0	51
mmu-miR-7658-3p	298	141	0	263	11	240	16	255
mmu-miR-7666-3p	447	292	378	304	428	417	220	136
mmu-miR-7667-5p	488	227	495	314	394	455	188	358
mmu-miR-7669-3p	0	11	26	0	11	13	31	0
mmu-miR-7669-5p	881	390	495	283	608	480	628	562
mmu-miR-7670-5p	0	11	0	0	0	25	16	85
mmu-miR-7674-3p	190	65	156	172	146	164	141	187
mmu-miR-7676-3p	0	32	91	132	56	13	78	0
mmu-miR-7680-5p	0	32	0	10	56	38	0	34
mmu-miR-7687-3p	0	22	0	20	23	51	78	68
mmu-miR-7689-3p	0	22	26	30	34	0	0	0
mmu-miR-7a-2-3p	136	0	0	162	225	63	94	477
mmu-miR-7b-5p	0	43	13	0	0	13	0	562
mmu-miR-802-3p	149	130	209	152	338	101	424	85
mmu-miR-802-5p	596	282	626	587	1801	910	4489	1720
mmu-miR-8091	81	22	91	334	0	88	298	51
mmu-miR-8097	27	76	183	304	79	228	63	119
mmu-miR-8103	0	0	0	101	79	0	31	17
mmu-miR-8112	230	65	183	283	214	228	220	341
mmu-miR-8114	8199	3249	8252	7470	5921	5436	6011	13182
mmu-miR-8115	0	0	26	132	34	0	31	17
mmu-miR-8116	0	43	0	40	23	25	31	17
mmu-miR-8118	312	173	156	213	101	101	188	698
mmu-miR-872-3p	6640	3260	6414	5294	4063	4387	4426	4343
mmu-miR-872-5p	10353	10949	9868	11539	9106	13413	10045	14902
mmu-miR-877-3p	2941	877	2555	3401	2251	1833	1821	1873
mmu-miR-879-3p	54	130	78	10	23	13	16	17
mmu-miR-879-5p	68	184	52	30	146	63	235	307
mmu-miR-92a-1-5p	637	249	183	61	79	240	94	153
mmu-miR-96-3p	0	0	0	0	23	51	78	17
mmu-miR-98-3p	461	173	548	344	326	493	487	511
mmu-miR-99a-3p	3713	3910	1812	2794	2825	3729	78	1635

## Sheet: conserved miRNAs
miRNA_name	Plasma_control_rep1	Plasma_control_rep2	Plasma_day7_rep1	Plasma_day7_rep2	Plasma_day14_rep1	Plasma_day14_rep2	Plasma_day23_rep1	Plasma_day23_rep2
hsa-let-7f-2-3p	20	12	38	28	23	33	32	17
hsa-miR-1260b	68	22	65	30	135	76	10579	11632
hsa-miR-1306-5p	1694	1040	2333	1873	1790	1302	1067	2929
hsa-miR-136-3p	556	347	222	334	473	442	251	528
hsa-miR-138-1-3p	136	0	183	71	203	126	188	102
hsa-miR-139-5p	652	357	794	946	873	779	845	477
hsa-miR-145-3p	542	455	873	1326	675	1138	1020	647
hsa-miR-181c-3p	786	574	469	435	495	544	659	937
hsa-miR-185-3p	16	30	5	10	6	12	3	12
hsa-miR-18a-3p	24	26	16	15	15	18	6	12
hsa-miR-320b	894	2198	2685	2348	822	2048	1083	2725
hsa-miR-320c	1775	6108	8187	7915	3816	4867	3171	4786
hsa-miR-320d	2792	4321	2725	5840	2870	3894	1287	2640
hsa-miR-324-3p	705	7050	1708	334	946	7244	14252	4769
hsa-miR-378a-3p	2076	2250	2528	2408	2098	1984	1512	1165
hsa-miR-378b	68	152	0	111	79	63	63	119
hsa-miR-378d	1965	2772	1304	2115	867	1188	1067	852
hsa-miR-378e	190	325	196	223	169	202	94	204
hsa-miR-378f	190	260	183	132	203	126	126	102
hsa-miR-378g	27	249	222	243	349	190	94	119
hsa-miR-382-3p	257	314	456	415	383	771	330	375
hsa-miR-425-3p	21	7	19	11	17	14	11	9
hsa-miR-4270	41	119	104	182	101	63	3845	5365
hsa-miR-4286	14622	7061	12345	10243	11414	11592	17234	21919
hsa-miR-4295	nd	nd	nd	nd	nd	nd	204	221
hsa-miR-4306	136	162	78	617	90	657	63	255
hsa-miR-4448	nd	nd	nd	nd	nd	nd	2025	5688
hsa-miR-4500	732	1581	117	749	608	1605	94	2946
hsa-miR-452-5p	108	87	39	121	45	126	126	34
hsa-miR-4792	nd	nd	nd	nd	nd	nd	173	307
hsa-miR-511-3p	95	347	39	273	124	455	173	153
hsa-miR-7977	nd	nd	nd	nd	nd	nd	267	187
hsa-miR-877-3p	827	141	769	759	664	367	487	647
hsa-miR-92a-3p	24728	16163	26709	21429	31103	21135	29228	24836
mmu-let-7a-1-3p	116	55	143	119	163	141	155	100
mmu-let-7a-5p	3219	1925	397	1114	843	1372	2830	5914
mmu-let-7b-5p	11187	8296	4993	9181	6862	10538	10344	7570
mmu-let-7c-5p	22465	15618	5719	18197	9846	18905	17961	16722
mmu-let-7d-3p	768	580	1165	1006	763	678	486	381
mmu-let-7d-5p	4549	7640	1357	2085	962	3038	6623	13596
mmu-let-7e-3p	13	4	12	13	8	10	14	3
mmu-let-7e-5p	2	70	58	71	66	87	86	68
mmu-let-7f-2-3p	107	82	83	110	99	112	63	54
mmu-let-7f-5p	12071	12772	2053	2542	3510	3274	7947	17012
mmu-let-7g-5p	134305	124179	88774	96710	84993	102065	90480	95510
mmu-let-7i-3p	16	20	4	10	11	12	6	27
mmu-let-7i-5p	279	631	206	642	245	357	687	171
mmu-miR-100-5p	271	363	233	328	238	235	168	141
mmu-miR-101a-3p	2563	1540	2210	2389	4084	1920	2334	1041
mmu-miR-101a-5p	420	888	352	820	360	872	1366	1226
mmu-miR-103-2-5p	49	74	98	120	79	93	83	73
mmu-miR-103-3p	10355	14739	5382	5511	9214	10484	14743	20716
mmu-miR-106b-3p	1965	2602	3103	2570	163	2399	1868	2152
mmu-miR-106b-5p	104976	98713	64197	76619	61409	34946	74386	58922
mmu-miR-107-3p	29	13	7	13	20	18	18	24
mmu-miR-10a-5p	136	153	109	140	136	103	77	55
mmu-miR-10b-5p	174	168	147	185	246	154	92	69
mmu-miR-122-5p	4639	1005	8202	4450	2642	2185	9483	2515
mmu-miR-124-3p	9	4	5	14	17	6	20	75
mmu-miR-1247-5p	9	5	25	27	23	5	20	12
mmu-miR-1249-3p	124	35	104	123	105	52	74	54
mmu-miR-125a-5p	759	860	863	938	707	788	508	417
mmu-miR-125b-5p	12004	9674	21337	21261	15065	14458	8678	4818
mmu-miR-126a-3p	6104	6274	4985	5595	5556	4663	4850	2895
mmu-miR-128-3p	809	308	998	856	1243	1081	1004	1549
mmu-miR-1306-3p	14	12	17	16	3	26	15	11
mmu-miR-130a-3p	5500	2693	6173	3956	6288	4345	4659	7533
mmu-miR-130b-3p	722	418	740	613	920	772	622	1103
mmu-miR-130b-5p	17	10	11	12	19	17	18	34
mmu-miR-132-3p	196	123	189	157	223	181	235	199
mmu-miR-133a-3p	19	25	67	93	59	152	38	10
mmu-miR-134-5p	30	45	39	49	27	28	11	7
mmu-miR-135a-5p	40	68	82	74	55	58	32	34
mmu-miR-136-5p	124	146	113	88	41	63	35	30
mmu-miR-138-5p	993	1353	2164	1874	1371	2337	1049	651
mmu-miR-139-5p	405	182	627	518	613	437	643	282
mmu-miR-140-3p	24282	25486	34341	28758	29098	22391	18614	17511
mmu-miR-140-5p	6113	4952	3067	3329	3702	4508	3303	4296
mmu-miR-141-3p	285	427	355	372	381	198	243	214
mmu-miR-142-3p	194	406	63	97	133	126	98	274
mmu-miR-142-5p	661	333	170	210	436	348	603	1052
mmu-miR-143-3p	3823	3138	4674	5158	3289	4145	3790	1816
mmu-miR-144-3p	28452	84825	4592	9179	1650	13766	31421	33858
mmu-miR-144-5p	419	862	75	134	269	308	826	3072
mmu-miR-145a-5p	4440	3650	7303	7422	5272	5631	4393	2239
mmu-miR-146a-5p	1439	1319	2140	2082	2500	2018	1819	1884
mmu-miR-146b-5p	328	541	951	1125	924	933	554	306
mmu-miR-147-3p	19	15	21	35	13	21	7	5
mmu-miR-148a-3p	326	268	458	443	512	478	462	353
mmu-miR-148b-3p	107	101	245	229	349	288	274	283
mmu-miR-148b-5p	99	113	78	64	87	82	56	87
mmu-miR-149-5p	128	51	133	127	97	78	58	28
mmu-miR-150-5p	5549	2818	7072	6333	7269	4837	5237	3182
mmu-miR-151-5p	177	146	124	155	216	43	177	5
mmu-miR-152-3p	503	263	421	406	413	370	293	215
mmu-miR-154-5p	55	47	9	59	35	33	6	13
mmu-miR-15a-5p	1224	1087	743	950	1205	1473	2080	3022
mmu-miR-15b-3p	174	285	371	374	240	471	577	600
mmu-miR-15b-5p	404	178	104	106	338	269	722	1883
mmu-miR-16-5p	64032	70901	88319	90826	128409	112288	108125	153669
mmu-miR-17-5p	5792	4523	5687	4338	7076	3957	7499	10599
mmu-miR-181a-1-3p	57	37	44	63	40	31	28	24
mmu-miR-181a-5p	428	181	143	148	394	231	226	761
mmu-miR-181b-5p	138	62	41	64	133	92	92	176
mmu-miR-181c-5p	812	479	843	786	1167	1155	1086	1205
mmu-miR-181d-5p	44	18	79	72	129	105	123	118
mmu-miR-183-5p	40	19	84	70	123	119	60	49
mmu-miR-185-3p	48	100	54	67	52	53	24	47
mmu-miR-185-5p	5635	6344	6045	7286	4760	5565	3259	4700
mmu-miR-186-5p	5338	7636	8176	6018	9379	7318	6957	8813
mmu-miR-187-3p	26	36	88	77	44	47	33	20
mmu-miR-188-5p	194	120	130	154	147	165	136	98
mmu-miR-18a-3p	231	237	350	413	291	314	215	214
mmu-miR-18a-5p	2574	3787	1813	2124	972	3162	1684	2868
mmu-miR-190b-5p	15	15	9	21	11	20	10	18
mmu-miR-191-5p	4098	4221	7596	6209	3006	5388	7403	9274
mmu-miR-192-3p	26	17	50	26	49	31	49	24
mmu-miR-192-5p	5323	5770	12362	10999	11347	8819	10119	4949
mmu-miR-193a-3p	119	220	52	55	64	72	41	28
mmu-miR-194-5p	95	146	36	42	84	98	164	207
mmu-miR-195a-5p	622	341	533	495	743	527	641	588
mmu-miR-196a-5p	24	16	3	10	15	13	13	17
mmu-miR-196b-3p	13	15	25	27	38	12	23	17
mmu-miR-196b-5p	27	40	10	14	12	17	21	27
mmu-miR-199a-3p	2712	1076	2716	2678	2629	2369	1934	1079
mmu-miR-199a-5p	858	1050	475	734	552	843	399	313
mmu-miR-19a-3p	9317	9399	7260	6824	7187	7495	5305	6514
mmu-miR-19b-1-5p	91	52	56	65	52	67	42	50
mmu-miR-19b-3p	16116	14953	10904	9721	11922	12341	9283	12699
mmu-miR-1a-3p	301	415	420	451	112	433	351	117
mmu-miR-200a-3p	757	450	1165	1279	873	749	954	325
mmu-miR-200b-3p	186	226	227	142	238	356	444	102
mmu-miR-203-3p	23718	30986	55811	54081	61723	72059	28818	16519
mmu-miR-204-5p	14	4	22	16	22	15	13	9
mmu-miR-205-5p	13675	9638	38453	34549	41149	42107	20697	10732
mmu-miR-20a-5p	75402	71547	7772	42186	26488	39061	33489	29538
mmu-miR-20b-5p	110	58	36	62	70	51	76	135
mmu-miR-210-3p	1394	2367	2156	2716	26	781	1785	764
mmu-miR-212-3p	7	7	13	10	12	10	10	5
mmu-miR-214-3p	509	308	493	377	457	479	296	169
mmu-miR-214-5p	62	81	48	129	8	30	54	14
mmu-miR-218-5p	131	153	253	272	152	172	75	50
mmu-miR-21a-5p	7549	7858	3991	6305	8482	9739	16169	16635
mmu-miR-221-3p	8105	1480	17132	11988	13892	13733	4618	4395
mmu-miR-222-3p	3007	2781	2921	3106	3735	3083	2514	3705
mmu-miR-223-3p	19289	6077	38634	35023	30848	17334	24686	17224
mmu-miR-223-5p	21	19	69	66	21	35	39	35
mmu-miR-22-3p	2461	2678	2890	3909	1331	2103	2548	1704
mmu-miR-22-5p	980	624	818	925	716	832	660	493
mmu-miR-23a-3p	25325	12078	37605	28238	40945	32474	36213	22585
mmu-miR-23b-3p	817	334	1166	906	1386	989	1267	741
mmu-miR-24-3p	19393	13687	23444	17212	24436	22257	18301	16480
mmu-miR-25-3p	10205	5961	9306	7782	13787	14378	13578	21203
mmu-miR-25-5p	31	29	39	39	37	30	26	38
mmu-miR-26a-5p	4806	3793	2416	2258	4733	3620	6563	10805
mmu-miR-26b-3p	50	41	73	64	63	45	47	35
mmu-miR-26b-5p	6221	3994	4493	3624	7678	5982	9928	12438
mmu-miR-27a-3p	3561	2113	3195	3403	3844	3626	3052	2883
mmu-miR-27b-3p	902	393	969	660	1081	1260	1226	438
mmu-miR-27b-5p	16	19	13	18	17	18	14	12
mmu-miR-296-5p	793	380	798	461	774	198	625	269
mmu-miR-297a-5p	60	34	62	48	32	42	25	36
mmu-miR-29a-3p	19747	18601	36255	28363	37620	29954	25234	22836
mmu-miR-29a-5p	94	131	174	183	105	182	138	124
mmu-miR-29b-3p	3332	1770	1044	969	2538	1768	2354	7086
mmu-miR-29c-3p	3099	2907	4008	3741	3692	2818	3045	2261
mmu-miR-29c-5p	19	35	15	11	16	22	13	14
mmu-miR-301a-3p	6488	5813	5714	5216	5786	5889	4859	6662
mmu-miR-3074-1-3p	131	158	151	145	163	173	165	181
mmu-miR-30a-3p	189	169	243	329	397	363	359	304
mmu-miR-30a-5p	9803	16830	16680	14356	12972	18552	13574	12927
mmu-miR-30b-5p	7957	6949	6811	7561	8584	11339	8071	8700
mmu-miR-30c-5p	9922	10091	7169	9120	11107	14971	12167	17480
mmu-miR-30d-5p	11701	16977	17046	13018	11072	16639	12084	12746
mmu-miR-30e-3p	122	88	54	80	141	147	206	246
mmu-miR-30e-5p	23239	23732	29931	29204	23004	29832	22040	23578
mmu-miR-3107-5p	11250	22837	36693	20042	6190	18866	12341	10472
mmu-miR-31-3p	206	107	360	320	491	437	479	296
mmu-miR-31-5p	733	784	730	52	556	1105	1634	847
mmu-miR-320-3p	6162	10481	20634	16162	7024	10299	2727	7944
mmu-miR-324-5p	94	57	71	63	78	30	78	58
mmu-miR-32-5p	7	17	11	10	9	17	27	24
mmu-miR-326-3p	1749	1339	1805	1777	1607	1380	872	1160
mmu-miR-328-3p	7363	3009	9786	7968	7722	4811	4427	5139
mmu-miR-331-3p	269	231	175	181	186	230	159	175
mmu-miR-33-3p	52	38	69	61	91	89	107	92
mmu-miR-335-5p	72	17	22	13	33	32	29	38
mmu-miR-33-5p	73	42	18	21	23	33	26	16
mmu-miR-338-3p	43	36	39	55	39	53	52	32
mmu-miR-339-5p	461	307	541	513	492	509	346	347
mmu-miR-340-3p	57	45	42	43	64	50	62	68
mmu-miR-340-5p	138	105	139	199	175	178	207	160
mmu-miR-342-3p	431	108	743	281	698	198	421	192
mmu-miR-34a-3p	22	45	3	40	41	40	41	24
mmu-miR-34a-5p	879	1643	1693	1536	494	1777	1043	775
mmu-miR-34c-5p	57	38	23	28	8	38	22	16
mmu-miR-361-3p	36	17	36	30	25	21	23	17
mmu-miR-361-5p	198	134	339	406	381	323	268	169
mmu-miR-363-3p	27	9	10	14	14	12	13	6
mmu-miR-365-3p	500	186	673	630	556	385	414	179
mmu-miR-369-5p	16	19	14	26	10	15	5	11
mmu-miR-374b-5p	1613	1610	933	697	1535	1298	2165	3295
mmu-miR-375-3p	51	83	98	120	115	117	99	120
mmu-miR-378a-3p	1005	1402	1427	1218	1125	976	782	739
mmu-miR-378a-5p	306	316	489	103	401	310	244	276
mmu-miR-379-5p	40	63	16	30	15	33	16	19
mmu-miR-382-5p	161	115	191	171	21	109	56	41
mmu-miR-409-3p	35	31	35	41	21	26	8	5
mmu-miR-421-3p	353	182	313	164	511	295	540	838
mmu-miR-423-3p	486	310	332	388	297	310	186	302
mmu-miR-423-5p	349	223	301	422	387	382	268	86
mmu-miR-425-3p	45	13	43	27	32	26	14	26
mmu-miR-425-5p	5172	6503	6987	6526	7753	7285	6179	6345
mmu-miR-449a-5p	59	90	22	60	12	38	34	44
mmu-miR-455-5p	577	340	56	90	32	78	19	11
mmu-miR-484	7189	2871	7313	5077	7098	3825	4861	4894
mmu-miR-486-3p	2747	1781	2235	1549	2844	2162	2447	2373
mmu-miR-491-5p	10	29	18	23	15	23	11	17
mmu-miR-494-3p	36	22	33	31	24	21	10	15
mmu-miR-496a-3p	16	13	18	14	13	14	10	4
mmu-miR-497-5p	59	43	12	30	25	33	42	32
mmu-miR-499-5p	24	17	12	16	13	12	0	8
mmu-miR-505-5p	33	19	3	14	17	15	51	21
mmu-miR-532-3p	34	14	26	24	26	29	38	41
mmu-miR-532-5p	733	742	1151	1092	932	1048	818	634
mmu-miR-542-3p	228	124	114	139	112	140	78	93
mmu-miR-551b-3p	13	7	9	11	31	22	48	29
mmu-miR-574-3p	1346	708	1043	833	1053	872	916	652
mmu-miR-574-5p	218	172	113	133	22	72	50	38
mmu-miR-590-5p	0	0	1	1	25	14	52	51
mmu-miR-652-3p	600	201	573	605	461	839	44	653
mmu-miR-671-5p	26	82	135	178	115	152	93	90
mmu-miR-708-5p	7	20	4	11	14	25	12	10
mmu-miR-744-5p	1778	1451	2038	1295	2023	1396	1419	1396
mmu-miR-7a-1-3p	138	48	155	86	241	169	303	287
mmu-miR-7a-5p	740	435	340	535	306	399	274	385
mmu-miR-874-3p	49	26	126	121	98	9	66	36
mmu-miR-877-5p	63	38	40	51	37	40	22	11
mmu-miR-92a-3p	9079	5906	9173	5917	9902	7152	8286	8726
mmu-miR-92b-3p	37	6	19	17	18	10	13	5
mmu-miR-93-3p	1372	1202	1243	1868	1559	1215	1235	1072
mmu-miR-93-5p	30359	47370	25750	40565	23373	23463	72204	46580
mmu-miR-98-5p	100	111	30	42	6	49	53	153
mmu-miR-99a-5p	2299	3240	1314	1693	1541	1603	859	987
mmu-miR-99b-3p	22	14	26	25	9	39	20	18
mmu-miR-99b-5p	76	52	39	57	90	97	72	62
