# Supplementary material for: Circulating miRNAs in Small Extracellular Vesicles Secreted by a Human Melanoma Xenograft in Mouse Brains
Source: Cancers (Basel). 2020 Jun 19;12(6):1635. doi: 10.3390/cancers12061635 (PMC7352810; doi:10.3390/cancers12061635)
Supplement: Supplementary file 1 [file cancers-12-01635-s001.zip › Supplementary Table S2.xlsx]

## Sheet: human-specific miRNAs
Table S2. Normalized read counts (counts per million, CPM) for all the miRNAs found in plasma-purified small EVs (sEVs) at day 23 after intracranial injection of M14 metastatic melanoma cells. (miRNAs are classified as conserved, human-specific and mouse-specific according to the bioinformatics pipeline described in the paper)
miRNA_name	sEVs_day23_rep1	sEVs_day23_rep2
hsa-miR-122-3p	2295.18	557.973
hsa-miR-1225-5p	491.823	0
hsa-miR-1246	1024.63	697.467
hsa-miR-1260a	0	27.8987
hsa-miR-1268a	6352.72	3292.04
hsa-miR-1287-5p	0	0
hsa-miR-1307-3p	0	0
hsa-miR-1307-5p	0	0
hsa-miR-151a-3p	40.9853	0
hsa-miR-193a-5p	0	27.8987
hsa-miR-193b-3p	0	27.8987
hsa-miR-197-3p	0	0
hsa-miR-199b-5p	0	278.987
hsa-miR-211-5p	40.9853	0
hsa-miR-224-5p	245.912	1841.31
hsa-miR-2277-3p	0	27.8987
hsa-miR-23c	40.9853	0
hsa-miR-28-3p	0	0
hsa-miR-3180	0	557.973
hsa-miR-3180-3p	0	0
hsa-miR-3195	40.9853	27.8987
hsa-miR-345-5p	0	27.8987
hsa-miR-3615	0	0
hsa-miR-3648	0	0
hsa-miR-3656	40.9853	27.8987
hsa-miR-373-3p	1352.51	0
hsa-miR-376a-5p	0	27.8987
hsa-miR-376c-3p	860.691	0
hsa-miR-424-5p	286.897	83.696
hsa-miR-4256	0	27.8987
hsa-miR-4258	2664.04	1032.25
hsa-miR-4300	40.9853	139.493
hsa-miR-4326	0	0
hsa-miR-4417	81.9706	27.8987
hsa-miR-4466	0	306.885
hsa-miR-4488	0	0
hsa-miR-4492	327.882	139.493
hsa-miR-4497	0	27.8987
hsa-miR-4508	0	0
hsa-miR-4516	0	390.581
hsa-miR-4532	0	0
hsa-miR-4676-5p	0	27.8987
hsa-miR-501-3p	0	195.291
hsa-miR-501-5p	0	27.8987
hsa-miR-518e-3p	0	167.392
hsa-miR-6131	11189	2427.18
hsa-miR-660-5p	368.868	809.061
hsa-miR-6756-3p	0	0
hsa-miR-6850-3p	0	0
hsa-miR-6853-5p	9631.54	2482.98
hsa-miR-7706	0	0
hsa-miR-802	0	139.493
hsa-miR-887-3p	0	0
hsa-miR-940	0	0

## Sheet: mouse-specific miRNAs
miRNA_name	sEVs_day23_rep1	sEVs_day23_rep2
mmu-miR-101b-3p	5614.98	17129.8
mmu-miR-106a-5p	10656.2	725.365
mmu-miR-107-5p	81.9706	55.7973
mmu-miR-1188-5p	0	0
mmu-miR-1191	1311.53	725.365
mmu-miR-1198-5p	6434.69	3710.52
mmu-miR-1199-5p	0	0
mmu-miR-122-3p	0	781.163
mmu-miR-1249-5p	696.75	0
mmu-miR-125b-2-3p	0	55.7973
mmu-miR-130a-5p	4344.44	2231.89
mmu-miR-151-3p	13443.2	9094.97
mmu-miR-155-5p	983.647	3208.35
mmu-miR-15a-3p	81.9706	1450.73
mmu-miR-16-2-3p	122.956	3905.81
mmu-miR-17-3p	16640	42433.9
mmu-miR-181c-3p	8852.82	6054.01
mmu-miR-1839-3p	1885.32	669.568
mmu-miR-1839-5p	18607.3	25555.2
mmu-miR-1843b-5p	1188.57	1255.44
mmu-miR-186-3p	4057.54	3013.06
mmu-miR-18b-5p	409.853	83.696
mmu-miR-191-3p	1024.63	0
mmu-miR-1927	1885.32	334.784
mmu-miR-1934-3p	81.9706	0
mmu-miR-1934-5p	0	0
mmu-miR-193a-5p	0	139.493
mmu-miR-193b-3p	327.882	3013.06
mmu-miR-1943-3p	0	0
mmu-miR-1943-5p	901.676	0
mmu-miR-1954	0	278.987
mmu-miR-1964-3p	2295.18	27.8987
mmu-miR-1964-5p	0	920.656
mmu-miR-1968-5p	0	390.581
mmu-miR-1981-5p	1434.49	27.8987
mmu-miR-199b-5p	32255.4	134834
mmu-miR-20a-3p	409.853	613.771
mmu-miR-20b-3p	5942.87	1590.22
mmu-miR-210-5p	5082.18	864.859
mmu-miR-2137	76027.7	52700.6
mmu-miR-215-5p	6188.78	2259.79
mmu-miR-219a-1-3p	0	0
mmu-miR-21a-3p	7705.23	15316.4
mmu-miR-224-5p	0	2845.66
mmu-miR-24-2-5p	36845.8	30995.4
mmu-miR-28a-3p	0	1255.44
mmu-miR-294-3p	0	0
mmu-miR-298-5p	0	557.973
mmu-miR-301b-3p	3114.88	2734.07
mmu-miR-3060-3p	0	474.277
mmu-miR-3068-3p	4754.29	2036.6
mmu-miR-3072-3p	0	0
mmu-miR-3081-3p	0	0
mmu-miR-3084-3p	5123.16	0
mmu-miR-3090-3p	0	0
mmu-miR-3091-5p	2131.23	0
mmu-miR-3102-3p	40.9853	1952.91
mmu-miR-3102-3p.2-3p	327.882	0
mmu-miR-3102-5p.2-5p	737.735	0
mmu-miR-322-3p	1352.51	22514.2
mmu-miR-322-5p	248043	172386
mmu-miR-324-3p	0	334.784
mmu-miR-329-3p	0	697.467
mmu-miR-329-5p	2418.13	223.189
mmu-miR-330-3p	9303.66	3068.85
mmu-miR-339-3p	4467.4	1506.53
mmu-miR-341-3p	1065.62	474.277
mmu-miR-344-3p	0	1367.03
mmu-miR-344d-3p	0	1227.54
mmu-miR-345-5p	3073.9	306.885
mmu-miR-3473b	5737.94	5579.73
mmu-miR-350-3p	2131.23	25136.7
mmu-miR-351-3p	737.735	1618.12
mmu-miR-351-5p	8320.01	2036.6
mmu-miR-3572-3p	1557.44	362.683
mmu-miR-362-3p	4057.54	10378.3
mmu-miR-362-5p	0	1115.95
mmu-miR-376a-3p	0	3626.83
mmu-miR-376b-3p	0	1618.12
mmu-miR-376b-5p	0	1339.14
mmu-miR-376c-3p	3442.76	7811.63
mmu-miR-378c	3688.68	15623.3
mmu-miR-429-3p	0	1339.14
mmu-miR-434-5p	4590.35	920.656
mmu-miR-449c-5p	0	0
mmu-miR-450b-3p	122.956	474.277
mmu-miR-455-3p	2623.06	3543.13
mmu-miR-466c-3p	4795.28	4352.19
mmu-miR-466d-3p	40.9853	2845.66
mmu-miR-466e-3p	2787	1394.93
mmu-miR-466h-3p	3975.57	3124.65
mmu-miR-466h-5p	0	864.859
mmu-miR-466i-5p	56231.8	34231.7
mmu-miR-466n-3p	696.75	167.392
mmu-miR-466n-5p	3852.62	334.784
mmu-miR-467a-5p	14836.7	8983.37
mmu-miR-467d-3p	27050.3	15176.9
mmu-miR-467e-5p	4836.26	3766.32
mmu-miR-483-5p	3073.9	0
mmu-miR-500-3p	819.706	15260.6
mmu-miR-501-3p	0	2371.39
mmu-miR-501-5p	0	83.696
mmu-miR-503-3p	81.9706	0
mmu-miR-503-5p	5164.15	14284.1
mmu-miR-5106	122.956	27.8987
mmu-miR-5107-5p	0	223.189
mmu-miR-5112	16845	19473.3
mmu-miR-511-3p	40.9853	1646.02
mmu-miR-5114	0	251.088
mmu-miR-5119	16681	3347.84
mmu-miR-5124a	7500.31	7448.95
mmu-miR-5126	819.706	641.669
mmu-miR-540-3p	0	474.277
mmu-miR-540-5p	0	334.784
mmu-miR-541-5p	1926.31	1199.64
mmu-miR-542-5p	5082.18	1590.22
mmu-miR-543-5p	0	669.568
mmu-miR-5621-5p	0	0
mmu-miR-5627-3p	0	0
mmu-miR-5627-5p	0	0
mmu-miR-582-5p	3278.82	2845.66
mmu-miR-652-5p	0	697.467
mmu-miR-6538	0	223.189
mmu-miR-6546-3p	0	0
mmu-miR-664-3p	1885.32	4659.08
mmu-miR-664-5p	1188.57	1227.54
mmu-miR-666-3p	1926.31	1171.74
mmu-miR-667-3p	0	530.075
mmu-miR-669a-5p	3811.63	1199.64
mmu-miR-669b-5p	50166	22653.7
mmu-miR-669c-5p	3811.63	4826.47
mmu-miR-669f-3p	3852.62	502.176
mmu-miR-669f-5p	6557.65	2678.27
mmu-miR-669l-5p	7623.26	1897.11
mmu-miR-669o-3p	655.765	3654.73
mmu-miR-672-5p	3155.87	474.277
mmu-miR-674-3p	2049.26	1171.74
mmu-miR-674-5p	1393.5	2455.08
mmu-miR-676-3p	2705.03	5579.73
mmu-miR-676-5p	0	613.771
mmu-miR-6914-3p	0	0
mmu-miR-6936-3p	0	0
mmu-miR-6936-5p	0	0
mmu-miR-6943-3p	0	530.075
mmu-miR-6968-3p	0	0
mmu-miR-6988-3p	81.9706	55.7973
mmu-miR-700-3p	0	27.8987
mmu-miR-700-5p	2418.13	3877.92
mmu-miR-702-3p	0	83.696
mmu-miR-7036b-5p	0	0
mmu-miR-7041-5p	0	0
mmu-miR-7042-3p	0	502.176
mmu-miR-7052-3p	0	27.8987
mmu-miR-709	5819.91	864.859
mmu-miR-7091-3p	5369.07	0
mmu-miR-7115-5p	0	0
mmu-miR-7117-3p	491.823	0
mmu-miR-7119-3p	0	251.088
mmu-miR-7658-3p	0	0
mmu-miR-7666-3p	0	1757.62
mmu-miR-7667-5p	0	83.696
mmu-miR-802-3p	0	0
mmu-miR-802-5p	0	446.379
mmu-miR-8097	0	0
mmu-miR-8112	0	83.696
mmu-miR-8114	4426.41	27.8987
mmu-miR-8116	0	27.8987
mmu-miR-872-3p	2418.13	5551.84
mmu-miR-872-5p	7828.19	9764.54
mmu-miR-877-3p	40.9853	278.987
mmu-miR-879-5p	5983.85	976.454
mmu-miR-92a-1-5p	1844.34	1171.74
mmu-miR-99a-3p	696.75	5579.73

## Sheet: conserved miRNAs
miRNA_name	sEVs_day23_rep1	sEVs_day23_rep2
mmu-miR-150-5p	52556.5	34888.5
mmu-miR-29a-3p	41840.5	43183.9
mmu-miR-21a-5p	50945	18724.5
mmu-miR-223-3p	43338.1	13083.4
mmu-miR-24-3p	30693.9	25715.6
mmu-miR-29b-3p	26184.1	28671.5
mmu-miR-23a-3p	26107.3	22632.3
mmu-miR-16-5p	26999.2	15152.2
mmu-miR-130a-3p	21753.9	19048.9
mmu-let-7g-5p	19000	20434.6
mmu-miR-93-5p	23383.9	15035.1
mmu-miR-103-3p	25750.8	11540.6
mmu-miR-122-5p	26583	7200.42
mmu-let-7f-5p	16065.9	17616.4
mmu-miR-144-3p	8298.67	24079.9
mmu-miR-19b-3p	15331.7	16059.9
mmu-miR-126a-3p	17969	11247.3
mmu-miR-26a-5p	11511.1	15022.7
hsa-miR-4792	11107	14758.4
mmu-miR-191-5p	14581.6	9405.66
hsa-miR-92a-3p	14221.2	8606.76
mmu-miR-125b-5p	7424.01	13986.2
mmu-miR-320-3p	14441.2	6604
mmu-miR-99a-5p	13650	6701.11
mmu-let-7d-5p	8262.89	11590.2
mmu-miR-185-5p	15131.6	4637.06
mmu-let-7a-5p	5886.73	12001.4
mmu-miR-181a-5p	9386.69	6886.37
hsa-miR-4286	6926.51	9178.66
mmu-miR-106b-5p	4300.41	11450.4
hsa-miR-4448	13935	1729.72
mmu-miR-328-3p	10534.4	3355.38
mmu-miR-30d-5p	8423.24	5274.11
mmu-miR-425-5p	9719.33	3193.53
mmu-let-7c-5p	3494.66	8586.1
mmu-miR-140-3p	8488.18	3559.92
mmu-miR-142-5p	3831.28	7759.65
mmu-miR-30e-5p	4468.72	6814.75
mmu-miR-29c-3p	4369.32	6091.61
mmu-miR-30a-5p	5516.98	4854
mmu-miR-27a-3p	5742.27	4554.41
mmu-miR-142-3p	5128.69	5040.64
mmu-miR-23b-3p	4906.05	4659.1
mmu-miR-30c-5p	4587.99	4763.09
mmu-miR-221-3p	4517.75	4736.23
mmu-miR-30b-5p	3909.46	4607.44
mmu-miR-186-5p	5457.35	3049.59
mmu-miR-17-5p	4823.88	3378.79
mmu-miR-15b-5p	5100.86	2962.13
mmu-miR-19a-3p	3405.87	4548.22
hsa-miR-324-3p	2705.03	4826.47
mmu-let-7b-5p	1916.3	5298.91
mmu-miR-25-3p	3859.11	2491.05
mmu-miR-301a-3p	4165.24	1895.32
hsa-miR-1260b	2172.22	3292.04
mmu-miR-652-3p	3727.91	1256.2
mmu-miR-26b-5p	1897.75	3031.68
mmu-miR-144-5p	3082.51	1729.34
mmu-miR-20a-5p	1464.39	3325.07
mmu-miR-92a-3p	3327.68	1402.21
mmu-miR-101a-5p	901.676	3347.84
mmu-miR-192-5p	2877.1	1070.94
mmu-miR-326-3p	2862.52	1035.81
hsa-miR-378a-3p	2427.84	1332.65
mmu-miR-145a-5p	1926.9	1719.7
mmu-miR-210-3p	2146.89	1483.47
mmu-miR-146a-5p	1623.42	1854
mmu-miR-128-3p	1696.31	1743.12
hsa-miR-139-5p	1215.25	1980.03
hsa-miR-320c	368.868	2817.77
mmu-miR-140-5p	1533.31	1627.41
mmu-miR-34a-5p	1835.46	981.406
mmu-miR-328-5p	2470.25	261.708
mmu-miR-203-3p	1068.15	1655.65
mmu-miR-151-5p	1964.01	758.954
mmu-miR-1a-3p	673.223	1984.16
mmu-miR-125a-5p	1913.65	743.114
mmu-miR-15a-5p	1497.52	1046.83
mmu-miR-423-3p	1892.45	649.45
mmu-let-7i-5p	940.922	1573
mmu-miR-22-3p	1009.83	1461.43
mmu-miR-339-5p	1505.48	878.1
mmu-miR-532-5p	1745.34	612.26
mmu-miR-671-5p	1626.07	694.905
mmu-miR-152-3p	1363.67	910.47
mmu-miR-143-3p	564.553	1606.75
mmu-miR-222-3p	1376.93	786.502
hsa-miR-320d	1147.59	1004.35
mmu-miR-181c-5p	1137.06	975.897
hsa-miR-7977	368.868	1590.22
mmu-miR-199a-5p	800.446	1015.15
mmu-miR-199a-3p	662.621	1091.6
mmu-miR-10a-5p	1277.53	439.395
mmu-miR-484	799.121	878.789
mmu-miR-101a-3p	214.689	1420.8
mmu-miR-195a-5p	861.407	691.461
mmu-miR-27b-3p	394.922	1141.19
mmu-let-7e-5p	674.548	842.976
hsa-miR-4295	942.662	557.973
mmu-miR-136-5p	722.257	727.962
mmu-miR-378a-3p	698.403	723.83
mmu-miR-181b-5p	739.485	676.309
mmu-miR-130b-3p	1053.57	341.598
mmu-miR-342-3p	732.859	657.714
mmu-miR-574-5p	1021.76	337.466
mmu-miR-148a-3p	925.019	429.753
hsa-miR-4306	942.662	362.683
mmu-miR-744-5p	751.412	537.191
mmu-miR-3107-5p	874.66	413.912
mmu-miR-574-3p	906.466	370.524
mmu-miR-100-5p	752.738	469.009
mmu-miR-99b-5p	817.674	395.317
mmu-let-7d-3p	528.772	639.119
mmu-miR-29a-5p	597.684	495.18
hsa-miR-378d	163.941	892.758
mmu-miR-139-5p	510.218	393.251
mmu-miR-181d-5p	540.699	357.439
mmu-miR-31-5p	471.786	418.045
mmu-miR-20b-5p	557.927	326.447
mmu-miR-107-3p	499.616	355.372
mmu-miR-10b-5p	585.757	266.529
hsa-miR-1306-5p	0	836.96
mmu-miR-361-5p	515.519	310.606
mmu-miR-214-3p	315.408	425.62
hsa-miR-320b	40.9853	669.568
hsa-miR-378g	40.9853	669.568
mmu-miR-374b-5p	327.335	377.411
mmu-miR-106b-3p	553.951	120.524
mmu-miR-22-5p	242.519	414.601
hsa-miR-101-5p	0	641.669
mmu-miR-423-5p	421.427	199.725
mmu-miR-93-3p	420.102	183.885
mmu-miR-194-5p	438.655	156.336
mmu-miR-138-5p	355.165	232.783
hsa-miR-181c-3p	81.9706	474.277
mmu-miR-130b-5p	377.694	150.827
mmu-miR-200a-3p	60.9611	442.149
mmu-miR-148b-3p	279.626	174.931
mmu-miR-378a-5p	253.121	193.526
mmu-miR-486-3p	254.447	173.554
mmu-miR-18a-5p	243.845	178.375
mmu-miR-146b-5p	161.68	257.576
mmu-miR-98-5p	327.335	90.9092
mmu-miR-421-3p	205.413	154.27
mmu-miR-30a-3p	163.005	163.912
mmu-miR-30e-3p	31.8058	280.303
mmu-miR-188-5p	106.019	205.923
mmu-miR-7a-1-3p	139.15	164.601
mmu-let-7i-3p	0	291.323
mmu-miR-497-5p	82.165	205.234
mmu-miR-29c-5p	99.3932	162.535
mmu-miR-218-5p	119.272	139.807
mmu-miR-27a-5p	225.291	15.8402
mmu-miR-382-5p	117.947	117.08
mmu-miR-340-5p	10.6019	214.876
mmu-miR-18a-3p	161.68	55.7852
mmu-miR-15b-3p	121.922	93.664
hsa-miR-425-3p	197.461	14.4628
mmu-miR-205-5p	115.296	96.4189
mmu-miR-214-5p	148.427	62.6723
mmu-miR-340-3p	153.728	55.7852
mmu-miR-335-5p	137.825	71.6254
mmu-miR-379-5p	1.32524	201.102
hsa-miR-136-5p	14.5777	186.639
mmu-let-7a-1-3p	125.898	73.6916
mmu-miR-33-5p	42.4078	143.251
mmu-miR-33-3p	45.0582	139.807
mmu-miR-297a-5p	72.8883	109.504
hsa-miR-378f	40.9853	139.493
mmu-miR-127-3p	102.044	70.9367
mmu-miR-34c-5p	139.15	28.237
mmu-miR-532-3p	152.403	13.0854
hsa-miR-4270	40.9853	111.595
mmu-miR-365-3p	18.5534	133.609
mmu-miR-32-5p	49.034	102.617
hsa-miR-4500	122.956	27.8987
hsa-miR-29b-1-5p	76.8641	63.361
mmu-miR-7a-5p	62.2864	76.4464
mmu-miR-338-3p	14.5777	121.901
mmu-miR-381-3p	100.718	24.1047
mmu-miR-539-5p	79.5145	40.6337
mmu-miR-551b-3p	83.4903	34.4353
mmu-miR-331-3p	42.4078	69.5593
mmu-miR-1306-3p	111.32	0
mmu-miR-223-5p	80.8398	27.5482
mmu-miR-181a-1-3p	0	103.306
mmu-miR-19b-1-5p	55.6602	46.832
mmu-miR-103-2-5p	37.1068	64.7384
mmu-miR-134-5p	43.733	56.4739
mmu-miR-200b-5p	82.165	15.1515
hsa-miR-378e	40.9853	55.7973
mmu-let-7f-2-3p	84.8155	9.64189
hsa-miR-18a-3p	92.767	0
mmu-miR-324-5p	6.62621	84.7109
mmu-miR-133a-3p	51.6844	35.124
mmu-miR-200b-3p	1.32524	84.7109
hsa-miR-139-3p	68.9126	16.5289
mmu-miR-149-5p	49.034	33.0579
mmu-miR-26b-3p	35.7815	45.4546
mmu-miR-296-5p	72.8883	0.688706
mmu-miR-99b-3p	5.30097	64.7384
mmu-miR-23a-5p	2.65048	66.8045
mmu-miR-196b-5p	47.7087	17.2177
mmu-miR-204-5p	39.7573	24.7934
mmu-miR-409-3p	34.4563	25.4821
mmu-miR-361-3p	0	58.54
mmu-miR-193a-3p	0	56.4739
mmu-miR-425-3p	11.9272	37.1901
mmu-miR-192-3p	0	48.8981
mmu-miR-342-5p	39.7573	8.95318
mmu-miR-132-3p	0	42.6998
mmu-miR-135a-5p	0	42.6998
mmu-miR-127-5p	0	37.8788
mmu-miR-1249-3p	0	35.8127
mmu-miR-187-3p	0	34.4353
mmu-miR-184-3p	0	32.3692
mmu-miR-147-3p	0	30.9918
mmu-miR-505-5p	26.5048	2.06612
mmu-miR-543-3p	0	27.5482
mmu-miR-877-5p	0	24.7934
mmu-miR-92b-3p	0	16.5289
mmu-miR-31-3p	0	15.1515
mmu-miR-485-5p	0	14.4628
hsa-miR-133a-5p	0	13.0854
mmu-miR-490-3p	0	13.0854
mmu-miR-874-3p	0	11.708
mmu-miR-671-3p	0	9.64189
mmu-miR-124-3p	0	4.13224
mmu-miR-1247-5p	2.65048	1.37741
hsa-miR-185-3p	0	0.688706
mmu-miR-25-5p	0	0.688706
mmu-miR-370-3p	0	0.688706
mmu-miR-375-3p	0	0.688706
hsa-miR-874-5p	0	0
hsa-miR-877-3p	0	0
mmu-miR-139-3p	0	0
mmu-miR-148a-5p	0	0
mmu-miR-185-3p	0	0
mmu-miR-193b-5p	0	0
mmu-miR-491-5p	0	0
