# Supplementary material for: Circulating miRNAs in Small Extracellular Vesicles Secreted by a Human Melanoma Xenograft in Mouse Brains
Source: Cancers (Basel). 2020 Jun 19;12(6):1635. doi: 10.3390/cancers12061635 (PMC7352810; doi:10.3390/cancers12061635)
Supplement: Supplementary file 1 [file cancers-12-01635-s001.zip › Supplementary Table S3.xlsx]

## Sheet:  annotations in total plasma 
Table S3. Functional annotations targeted by the most abundant human-specific miRNAs in the total plasma and in the sEV*
Total plasma
Annotation Cluster 1	Term	Category	Enrichment Score: 2.03	Count	Genes	P_Value
	KEGG_PATHWAY	Glioma		11	PRKCA, E2F1, MAPK1, IGF1R, E2F3, CCND1, GRB2, CDK6, PTEN, AKT2, CALM1	1.1E-3
	KEGG_PATHWAY	Melanoma		11	E2F1, MAPK1, E2F3, CCND1, CDKN1B, CRKL, CTBP2, GRB2, TGFBR1, CDK6, AKT2	2.2E-3
	KEGG_PATHWAY	Pathways in cancer		31	E2F1, FGF5, E2F3, FGF9, GRB2, PTEN, SUFU, ARNT, CCNE1, IGF1R, BCL2, RAC1, RHOA, AKT2, PRKCA, DVL3, CTBP2, EPAS1, TGFBR1, MET, ITGA2, CDK6, ARHGEF12, APPL1, STK4, MAPK1, CCND1, CDKN1B, CRKL, ADCY9, GSK3B	9.1E-3
Annotation Cluster 2			Enrichment Score: 1.97
	KEGG_PATHWAY	PI3K-Akt signaling pathways		35	FGF5, MCL1, FGF9, GRB2, PPP2R5C, FOXO3, PTEN, CCNE1, IGF1R, PPP2CA, BCL2, RAC1, GYS1, CREB3L2, THBS2, AKT2, PPP2R1B, PRKCA, MET, ITGA2, CDK6, IL6R, DDIT4, IFNAR1, EIF4B, MAPK1, YWHAG, CCND1, CDKN1B, YWHAH, CCND2, GSK3B, COL1A2, COL1A1	1.4E-4
	KEGG_PATHWAY	Pathways in cancer		31	E2F1, FGF5, E2F3, FGF9, GRB2, PTEN, SUFU, ARNT, CCNE1, IGF1R, BCL2, RAC1, RHOA, AKT2, PRKCA, DVL3, CTBP2, EPAS1, TGFBR1, MET, ITGA2, CDK6, ARHGEF12, APPL1, STK4, MAPK1, CCND1, CDKN1B, CRKL, ADCY9, GSK3B	9.1E-3
Annotation Cluster 3			Enrichment Score: 1.16
	KEGG_PATHWAY	Neurotrophin signaling pathway		17	GRB2, MAPKAPK2, FOXO3, PRKCD, MAPK1, MAP3K5, CRKL, MAPK14, MAP3K1, BCL2, GSK3B, RAC1, RHOA, SH2B3, FRS2, AKT2, CALM1	2.2E-4
sEVs
Annotation Cluster 1	Term	Category	Enrichment Score: 1.46	Count	Genes	P_Value
	KEGG_PATHWAY	Glioma		8	EGFR, NRAS, IGF1R, E2F2, CCND1, PDGFRA, CDK6, CALM1	0.00094
	KEGG_PATHWAY	FoxO signaling pathway		10	EGFR, NRAS, IGF1R, CCND1, CDKN1B, MAPK14, SETD7, PRKAA1, CCNG2, STK4	5.2E-3
	KEGG_PATHWAY	Melanoma		7	EGFR, NRAS, IGF1R, E2F2, CCND1, PDGFRA, CDK6	7.3E-3
	KEGG_PATHWAY	MicroRNAs in cancer		15	RECK, EGFR, E2F2, TP63, IGF2BP1, CDK6, RDX, CCNG1, HOXD10, NOTCH2, CCNE1, NRAS, CCND1, CDKN1B, PDGFRA	9.3E-3
Annotation Cluster 2			Enrichment Score: 1.09
	KEGG_PATHWAY	Glioma		8	EGFR, NRAS, IGF1R, E2F2, CCND1, PDGFRA, CDK6, CALM1	0.00094
	KEGG_PATHWAY	Melanoma		7	EGFR, NRAS, IGF1R, E2F2, CCND1, PDGFRA, CDK6	7.3E-3
*miRNAs used to generate these pathway annotations: miR-193b-3p, miR-197-3p, miR-660-5p, miR-1246, miR-345-5p, miR-193a-5p, miR-887, miR-211-5p, miR-362-3p, miR-502-3p

## Sheet: annotations in EVs
sEVs
Annotation Cluster 1	Term	Category	Enrichment Score: 1.46	Count	Genes	P_Value
	KEGG_PATHWAY	Glioma		8	EGFR, NRAS, IGF1R, E2F2, CCND1, PDGFRA, CDK6, CALM1	0.00094
	KEGG_PATHWAY	FoxO signaling pathway		10	EGFR, NRAS, IGF1R, CCND1, CDKN1B, MAPK14, SETD7, PRKAA1, CCNG2, STK4	5.2E-3
	KEGG_PATHWAY	Melanoma		7	EGFR, NRAS, IGF1R, E2F2, CCND1, PDGFRA, CDK6	7.3E-3
	KEGG_PATHWAY	MicroRNAs in cancer		15	RECK, EGFR, E2F2, TP63, IGF2BP1, CDK6, RDX, CCNG1, HOXD10, NOTCH2, CCNE1, NRAS, CCND1, CDKN1B, PDGFRA	9.3E-3
Annotation Cluster 2	Term	Category	Enrichment Score: 1.09	Count	Genes	P_Value
	KEGG_PATHWAY	Glioma		8	EGFR, NRAS, IGF1R, E2F2, CCND1, PDGFRA, CDK6, CALM1	0.00094
	KEGG_PATHWAY	Melanoma		7	EGFR, NRAS, IGF1R, E2F2, CCND1, PDGFRA, CDK6	7.3E-3
*miRNAs used to generate these pathway annotations: hsa-miR-1268a, hsa-miR-122-3p, hsa-miR-224-5p, hsa-miR-1246, hsa-miR-373-3p, hsa-miR-660-5p.
