# Supplementary material for: Circulating miRNAs in Small Extracellular Vesicles Secreted by a Human Melanoma Xenograft in Mouse Brains
Source: Cancers (Basel). 2020 Jun 19;12(6):1635. doi: 10.3390/cancers12061635 (PMC7352810; doi:10.3390/cancers12061635)
Supplement: Supplementary file 1 [file cancers-12-01635-s001.zip › Supplementary Table S4.xlsx]

## Sheet: annotations Total plasma
Table S4. Functional annotations targeted by the most abundant conserved miRNAs in the total plasma and in the sEV*
Total plasma
Annotation Cluster 1	Term	Category	Enrichment Score: 25.95	Count	Genes	P_Value
	KEGG_PATHWAY	Viral carcinogenesis		28	GRB2, NFKB1, CCNE2, CCNE1, KRAS, ATF6B, RAC1, CREB3L2, PIK3CA, TRAF5, PIK3R1, PIK3R2, RELA, CREBBP, CDK6, CREB5, RB1, STAT3, NRAS, MAPK1, CDKN1A, CCND1, HDAC2, CDKN1B, EP300, CCND2, JUN, JAK1	1.8e-13
Annotation Cluster 2			Enrichment Score: 20.37
	KEGG_PATHWAY	Ras signaling pathway		42	FGF7, PDGFB, GRB2, PDGFA, FGF9, NFKB1, IGF1R, KRAS, PAK2, RAC3, RASGRP1, SOS1, GAB1, RAC1, PIK3CA, RALA, PAK1, FGF2, CHUK, PIK3R1, AKT2, PIK3R2, PRKCA, EGFR, MAP2K1, RELA, MET, FGF23, HGF, STK4, KDR, PRKCB, PTPN11, MAPK1, NRAS, VEGFA, PDGFRA, CALM3, MAPK9, ABL1, ABL2, CALM1	8.1e-26
	KEGG_PATHWAY	ErbB signaling pathway		29	GRB2, CAMK2G, KRAS, PAK2, SOS1, GAB1, CAMK2D, PIK3CA, PAK1, PIK3R1, PIK3R2, AKT2, PRKCA, EGFR, MAP2K1, MAP2K4, PRKCB, NRAS, MAPK1, CDKN1A, CDKN1B, CRKL, JUN, NCK1, GSK3B, MAPK9, MTOR, ABL1, ABL2	4.5e-25
	KEGG_PATHWAY	Focal adhesion		35	PDGFB, PDGFA, GRB2, PTEN, CTNNB1, IGF1R, PDPK1, PAK2, RAC3, BCL2, SOS1, RAC1, PIK3CA, PAK1, PIK3R1, PIK3R2, AKT2, PRKCA, EGFR, VAV3, MAP2K1, MET, HGF, KDR, PRKCB, MAPK1, CCND1, CRKL, FYN, CCND2, JUN, GSK3B, VEGFA, PDGFRA, MAPK9	5.1e-20
	KEGG_PATHWAY	Rap1 signaling pathway		33	FGF7, PDGFB, PDGFA, FGF9, CDH1, CTNNB1, IGF1R, KRAS, RAC3, RAC1, PIK3CA, RALA, PLCB1, FGF2, PIK3R1, PIK3R2, AKT2, PRKCA, EGFR, MAP2K1, MET, FGF23, HGF, KDR, PRKCB, MAPK1, NRAS, CRKL, MAPK14, VEGFA, PDGFRA, CALM3, CALM1	8.5e-18
	KEGG_PATHWAY	Proteoglycans in cancer		32	GRB2, CAMK2G, CTNNB1, IGF1R, PDPK1, KRAS, SOS1, GAB1, RAC1, CAMK2D, PIK3CA, PAK1, FGF2, PIK3R1, PIK3R2, AKT2, PRKCA, EGFR, MAP2K1, MET, HGF, STAT3, KDR, PRKCB, PTPN11, MAPK1, NRAS, CCND1, CDKN1A, MAPK14, VEGFA, MTOR	1.8e-17
Annotation Cluster 4			Enrichment Score: 15.8
	KEGG_PATHWAY	Neurotrophin signaling pathway		30	GRB2, CAMK2G, NFKB1, FOXO3, PDPK1, MAP3K5, KRAS, BCL2, SOS1, GAB1, RAC1, CAMK2D, PIK3CA, PIK3R1, PIK3R2, AKT2, MAP2K1, RELA, PTPN11, MAPK1, NRAS, CRKL, CAMK4, JUN, MAPK14, GSK3B, MAPK9, CALM3, ABL1, CALM1	5.3e-22
	KEGG_PATHWAY	cAMP signaling pathway		24	VAV3, MAP2K1, CAMK2G, RELA, CREBBP, NFKB1, CREB5, MAPK1, FOS, EP300, CAMK4, RAC3, JUN, RAC1, CAMK2D, CREB3L2, CALM3, MAPK9, PIK3CA, PAK1, PIK3R1, AKT2, CALM1, PIK3R2	1.8e-10
Annotation Cluster 5			Enrichment Score: 15.32
	KEGG_PATHWAY	VEGF signaling pathway		19	PRKCA, PTGS2, MAP2K1, MAPKAPK3, PPP3R1, KDR, PRKCB, NRAS, MAPK1, KRAS, RAC3, MAPK14, RAC1, VEGFA, PPP3CB, PIK3CA, PIK3R1, AKT2, PIK3R2	1.3e-15
	KEGG_PATHWAY	Natural killer cell mediated cytotoxicity		22	PRKCA, VAV3, MAP2K1, GRB2, PPP3R1, PRKCB, IFNAR1, PTPN11, IFNAR2, NRAS, MAPK1, KRAS, RAC3, FYN, SOS1, RAC1, IFNG, PPP3CB, PIK3CA, PAK1, PIK3R1, PIK3R2	5.6e-13
	KEGG_PATHWAY	Chemokine signaling pathway		24	VAV3, MAP2K1, GRB2, RELA, NFKB1, FOXO3, STAT1, STAT3, MAPK1, NRAS, CRKL, KRAS, GSK3B, SOS1, RAC1, PIK3CA, JAK2, PAK1, WASL, PLCB1, CHUK, PIK3R1, AKT2, PIK3R2	5e-11
Annotation Cluster 6			Enrichment Score: 13.87
	KEGG_PATHWAY	Phosphatidylinositol signaling system		32	CDIPT, IMPAD1, PIP5K1C, ITPKB, PI4K2B, PIP5K1A, PTEN, CDS2, MTMR3, MTMR1, PIKFYVE, PIK3C3, PIK3CA, PLCB1, IPMK, INPP5B, INPP5A, PIK3R1, MTMR4, PIK3R2, IP6K2, PRKCA, PIK3C2A, DGKH, CDS1, TMEM55B, PRKCB, TMEM55A, CALM3, PIP4K2A, IPPK, CALM1	1.9e-27
	KEGG_PATHWAY	Inositol phosphate metabolism		20	IMPAD1, CDIPT, PIK3C2A, PIP5K1C, ITPKB, PI4K2B, PIP5K1A, PTEN, MTMR3, MTMR1, PIKFYVE, PIK3C3, PIK3CA, PIP4K2A, PLCB1, IPPK, INPP5B, IPMK, INPP5A, MTMR4	1.5e-15
Annotation Cluster 7			Enrichment Score: 13.73
	KEGG_PATHWAY	TNF signaling pathway		30	PTGS2, NFKB1, LIF, BAG4, FOS, MAP3K5, PGAM5, ATF6B, CREB3L2, PIK3CA, ITCH, TRAF5, CHUK, PIK3R1, PIK3R2, AKT2, CFLAR, MAP2K1, SOCS3, RELA, MAP2K4, CREB5, MMP14, TAB2, JUNB, TAB3, MAPK1, JUN, MAPK14, MAPK9	1.1e-23
	KEGG_PATHWAY	Toll-like receptor signaling pathway		19	MAP2K1, RELA, MAP2K4, NFKB1, STAT1, TAB2, IFNAR1, MAPK1, FOS, IFNAR2, JUN, MAPK14, RAC1, MAPK9, PIK3CA, CHUK, PIK3R1, AKT2, PIK3R2	3.6e-11
Annotation Cluster 8			Enrichment Score: 8.97
	KEGG_PATHWAY	Sphingolipid signaling pathway		22	PRKCA, MAP2K1, RELA, NFKB1, PTEN, PRKCB, NRAS, MAPK1, MAP3K5, PDPK1, KRAS, RAC3, FYN, BCL2, MAPK14, RAC1, MAPK9, PIK3CA, PLCB1, PIK3R1, AKT2, PIK3R2	4e-13
	KEGG_PATHWAY	Aldosterone-regulated sodium reabsorption		8	PRKCA, MAPK1, PDPK1, KRAS, PIK3CA, PIK3R1, PRKCB, PIK3R2	3e-05
Annotation Cluster 9			Enrichment Score: 3.71
	KEGG_PATHWAY	Melanogenesis		16	PRKCA, MAP2K1, CAMK2G, CREBBP, PRKCB, CTNNB1, NRAS, MAPK1, EP300, KRAS, GSK3B, CAMK2D, CREB3L2, CALM3, PLCB1, CALM1	9.9e-09
	KEGG_PATHWAY	Dopaminergic synapse		16	PRKCA, CAMK2G, CREB5, PRKCB, FOS, MAPK14, GSK3B, ATF6B, CAMK2D, CREB3L2, PPP3CB, CALM3, MAPK9, PLCB1, AKT2, CALM1	2.9e-07
	KEGG_PATHWAY	Inflammatory mediator regulation of TRP channels		12	PRKCA, MAPK14, CAMK2G, CAMK2D, CALM3, PIK3CA, MAPK9, PLCB1, PIK3R1, PRKCB, CALM1, PIK3R2	1.8e-05
	KEGG_PATHWAY	cGMP-PKG signaling pathway		14	MAP2K1, PPP3R1, CREB5, MAPK1, ATF6B, CREB3L2, PPP3CB, CALM3, PIK3CA, PLCB1, PIK3R1, AKT2, PIK3R2, CALM1	0.00015
	KEGG_PATHWAY	Calcium signaling pathway		13	EGFR, PRKCA, CAMK2G, PPP3R1, ITPKB, PRKCB, CAMK4, CAMK2D, PPP3CB, PDGFRA, CALM3, PLCB1, CALM1	0.0011
sEVs
Annotation Cluster 1	Term	Category	Enrichment Score: 3.71	Count	Genes	P_Value
	KEGG_PATHWAY	Glioma		27	E2F2, E2F3, PDGFB, PDGFA, GRB2, CAMK2G, PTEN, IGF1R, SOS1, PIK3R1, AKT2, PRKCA, EGFR, PIK3CG, MAP2K1, TP53, CDK6, RB1, PRKCB, NRAS, MAPK1, CDKN1A, CCND1, PDGFRA, CALM3, MTOR, CALM1	7.9e-06
	KEGG_PATHWAY	ErbB signaling pathway		27	GRB2, CAMK2G, PAK2, SOS1, PAK4, GAB1, PIK3R1, AKT2, PRKCA, EGFR, PIK3CG, MAP2K1, CBL, MAP2K4, PRKCB, NRAS, MAPK1, CDKN1A, CDKN1B, CRKL, GSK3B, NCK1, JUN, MAPK9, MTOR, ABL1, ABL2	0.0018
	KEGG_PATHWAY	Choline metabolism in cancer		27	SLC44A1, PDGFB, PDGFA, GRB2, PIP5K1A, GPCPD1, PDPK1, SOS1, PCYT1A, SLC22A5, PIK3R1, AKT2, PRKCA, EGFR, PIK3CG, MAP2K1, CHPT1, PRKCB, NRAS, MAPK1, SP1, TSC1, JUN, PDGFRA, MAPK9, MTOR, WASL	0.016
Annotation Cluster 2			Enrichment Score: 3.42
	KEGG_PATHWAY	Glioma		27	E2F2, E2F3, PDGFB, PDGFA, GRB2, CAMK2G, PTEN, IGF1R, SOS1, PIK3R1, AKT2, PRKCA, EGFR, PIK3CG, MAP2K1, TP53, CDK6, RB1, PRKCB, NRAS, MAPK1, CDKN1A, CCND1, PDGFRA, CALM3, MTOR, CALM1	7.9e-06
	KEGG_PATHWAY	Melanoma		25	PIK3CG, EGFR, E2F2, FGF18, E2F3, FGF7, PDGFB, MAP2K1, FGF9, PDGFA, MET, TP53, CDK6, RB1, HGF, PTEN, MAPK1, IGF1R, NRAS, CCND1, CDKN1A, PDGFRA, FGF2, PIK3R1, AKT2	0.00039
*miRNAs used to generate these pathway annotations: miR-16-5p, miR-93-5p, miR-23a-3p, miR-25-3p, miR-21a-5p, miR-223-3p, miR-92a-3p, miR-4286, miR-26b-5p, miR-1260b, miR-324-3p, miR-103-3p, miR-29a-3p, miR-30c-5p, miR-26a-5p.

## Sheet: annotations EVs
sEVs
Annotation Cluster 1	Term	Category	Enrichment Score: 3.71	Count	Genes	P_Value
	KEGG_PATHWAY	Glioma		27	E2F2, E2F3, PDGFB, PDGFA, GRB2, CAMK2G, PTEN, IGF1R, SOS1, PIK3R1, AKT2, PRKCA, EGFR, PIK3CG, MAP2K1, TP53, CDK6, RB1, PRKCB, NRAS, MAPK1, CDKN1A, CCND1, PDGFRA, CALM3, MTOR, CALM1	7.9e-06
	KEGG_PATHWAY	ErbB signaling pathway		27	GRB2, CAMK2G, PAK2, SOS1, PAK4, GAB1, PIK3R1, AKT2, PRKCA, EGFR, PIK3CG, MAP2K1, CBL, MAP2K4, PRKCB, NRAS, MAPK1, CDKN1A, CDKN1B, CRKL, GSK3B, NCK1, JUN, MAPK9, MTOR, ABL1, ABL2	0.0018
	KEGG_PATHWAY	Choline metabolism in cancer		27	SLC44A1, PDGFB, PDGFA, GRB2, PIP5K1A, GPCPD1, PDPK1, SOS1, PCYT1A, SLC22A5, PIK3R1, AKT2, PRKCA, EGFR, PIK3CG, MAP2K1, CHPT1, PRKCB, NRAS, MAPK1, SP1, TSC1, JUN, PDGFRA, MAPK9, MTOR, WASL	0.016
Annotation Cluster 2			Enrichment Score: 3.42	Count		P_Value
	KEGG_PATHWAY	Glioma		27	E2F2, E2F3, PDGFB, PDGFA, GRB2, CAMK2G, PTEN, IGF1R, SOS1, PIK3R1, AKT2, PRKCA, EGFR, PIK3CG, MAP2K1, TP53, CDK6, RB1, PRKCB, NRAS, MAPK1, CDKN1A, CCND1, PDGFRA, CALM3, MTOR, CALM1	7.9e-06
	KEGG_PATHWAY	Melanoma		25	PIK3CG, EGFR, E2F2, FGF18, E2F3, FGF7, PDGFB, MAP2K1, FGF9, PDGFA, MET, TP53, CDK6, RB1, HGF, PTEN, MAPK1, IGF1R, NRAS, CCND1, CDKN1A, PDGFRA, FGF2, PIK3R1, AKT2	0.00039
*miRNAs used to generate these pathway annotations: miR-150-5p, miR-29a-3p, miR-21a-5p, miR-24-3p, miR-29b-3p, miR-223-3p, miR-23a-3p, miR-16-5p, miR-130a-3p, let-7g-5p, miR-93-5p, miR-103-3p, miR-144-3p, let-7f-5p, miR-19b-3p, miR-122-5p.
